# Supplementary material
Source: PubMed Central journal article supplement (PMC4967210)
Supplement: Supplementary_Table_S1_and_S2.pdf [file Supplementary_Table_S1_and_S2.pdf]

## Supplementary Table S1: Primers used in this study

| Sequence 5' – 3'             | Use                                        |
|------------------------------|--------------------------------------------|
| 1. ACTCGTGTCAAAGCCGTTAGG     | Human TXNIP 5' qPCR primer                 |
| 2. TCCCTGCATCCAAAGCACTT      | Human TXNIP 3' qPCR primer                 |
| 3. CGAGTCAAAGCCGTCAGGAT      | Rat TXNIP 5' qPCR primer                   |
| 4. TTCATAGCGCAAGTAGTCCAAGGT  | Rat TXNIP qPCR primer                      |
| 5. CGAGTCAAAGCCGTCAGGAT      | Mouse TXNIP 5' qPCR primer                 |
| 6. TTCATAGCGCAAGTAGTCCAAGT   | Mouse TXNIP 3' qPCR primer                 |
| 7. TCCGCCTGTTCCGATGTAC       | Human SREBP2 5' qPCR primer                |
| 8. TGCACATT CAGCCAGGTTCA     | Human SREBP2 2' qPCR primer                |
| 9. TCTGACCACAATGCCGTTAA      | Rat SREBP2 5' qPCR primer                  |
| 10. CCCAGGCACTTGCTTAATGG     | Rat SREBP2 3' qPCR primer                  |
| 11. TCCGCAGACGAGGATCATC      | Mouse SREBP2 5' qPCR primer                |
| 12. AGCTGGTCGCTGCGTTCT       | Mouse SREBP2 3' qPCR primer                |
| 13. CCAGTGGCAGGCAATGTG       | Human NFYA 5' qPCR primer                  |
| 14. GCCCCAGGAACCATCATG       | Human NFYA 5' qPCR primer                  |
| 13. TGGCACAATCCTCCAGCAA      | Rat NFYA 5' qPCR primer                    |
| 14. CTGTGCCCCCTGCCAAACT      | Rat NFYA 3' qPCR primer                    |
| 15. TTCGCGCTCCGATTGG         | Rat SREBP2 NFY binding site 5' ChIP primer |
| 16. GCCCCATGTTTGTGTCA        | Rat SREBP2 NFY binding site 3' ChIP primer |
| 17. CCTCCTTCCAGACAGATCACT    | Rat Shc1 NFY binding site 5' ChIP primer   |
| 18. TTGTGTTAGCCAGGCCACTCT    | Rat Shc1 NFY binding site 3' ChIP primer   |
| 19. TCCCCAGGTCCTCTGTTATCA    | Rat Shc1 5' qPCR primer                    |
| 20. TCCCCAGACCCTTAGCCTAGTC   | Rat Shc1 3' qPCR primer                    |
| 21. GCCGACTGCAAACAGATCATT    | Mouse Shc1 5' qPCR primer                  |
| 22. ACCGGACGCGAAAGAGATAG     | Mouse Shc1 3' qPCR primer                  |
| 23. ACCATGCTTCACTGACATTCTGA  | Rat GAPDH 5' ChIP control primer           |
| 24. GGTCTGCCTCCCTGCTAACC     | Rat GAPDH 3' ChIP control primer           |
| 25. TGATGGACCTGGGATTGCA      | Human CROT 5' qPCR primer                  |
| 26. CGTGCCTTAGCCATCGA        | Human CROT 3' qPCR primer                  |
| 27. GATACTTTTACCATGGCCGAACA  | Rat CROT 5' qPCR primer                    |
| 28. CCTGACGGCCTCCACTGTA      | Rat CROT qPCR primer                       |
| 29. GGCAAAAAGCTCACCAAGGA     | Mouse CROT 5' qPCR primer                  |
| 30. CTGAAGAGCGAGCTGAATAAAGG  | Mouse CROT 3' qPCR primer                  |
| 31. TGCCATGGATCTGCTGTATATCC  | Human CPT1A 5' qPCR primer                 |
| 32. GCGTTGCCGGCTCTTG         | Human CPT1A 3' qPCR primer                 |
| 33. CATTACAAGGACATGGGCAAGTT  | Rat CPT1A 5' qPCR primer                   |
| 34. CGGAAGAGCCGGGTCAT        | Rat CPT1A 3' qPCR primer                   |
| 35. CACCAACGGGCTCATCTTCT     | Mouse CPT1A 5' qPCR primer                 |
| 36. CCTTCTATCGAATTTGCTCTGGTT | Mouse CPT1A 3' qPCR primer                 |
| 37. CCGCTGCCTTTGCTGTTT       | Human HADHB 5' qPCR primer                 |
| 38. TGTGAGAGCGCAGTGCATATT    | Human HADHB 3' qPCR primer                 |
| 39. CTGGCTGCTGCCTTTGCT       | Rat HADHB 5' qPCR primer                   |
| 40. CTGTGAGAACGCAGTGCATATTT  | Rat HADHB qPCR primer                      |
| 41. GGGTCCGCATTCCATTTCT      | Mouse HADHB 5' qPCR primer                 |
| 42. GCCAAGTCATGTGGCATTAGG    | Mouse HADHB 3' qPCR primer                 |

|     |                        |                                                     |
|-----|------------------------|-----------------------------------------------------|
| 43. | CGCTGACTCCTCAAGATGGGT  | NeoF1 Txnip <sup>lox/lox</sup> genotyping primer    |
| 44. | GGAAAGACAACGCCAGAAGG   | R2 Txnip <sup>lox/lox</sup> genotyping primer       |
| 45. | ACGTGCTACTTCCATTTGTC   | GT1 Txnip <sup>lox/lox</sup> genotyping primer      |
| 46. | GTTTCGAAGAACCTGATGGACA | Cre1 alphaMyHC-cre <sup>+/-</sup> genotyping primer |
| 47. | CTAGAGCCTGTTTTGCACGTTT | Cre2 alphaMyHC-cre <sup>+/-</sup> genotyping primer |

---

## Supplementary Table S2

### Changes in cardiac gene expression in cardiomyocyte-specific TXNIP knockout (cTKO) and control (lox/lox) mice

Differences in gene expression between cTKO and control littermate hearts were analyzed using Illumina mouse BeadChips. Genes found to be significantly changed ( $p < 0.05$ ) as assessed by one-way ANOVA are listed in alphabetical order;  $n = 3$  mice per group.

| Accession Number | Gene Symbol   | Gene Definition                                                                                                                                                                                                                             | Induction or repression in cTKO | Mean fold change for cTKO versus control |
|------------------|---------------|---------------------------------------------------------------------------------------------------------------------------------------------------------------------------------------------------------------------------------------------|---------------------------------|------------------------------------------|
| NM_178066.2      | 1110012D08Rik | Mus musculus RIKEN cDNA 1110012D08 gene (1110012D08Rik), mRNA.                                                                                                                                                                              | induction                       | 1.173599                                 |
| NM_028624.1      | 1110017D15Rik | Mus musculus RIKEN cDNA 1110017D15 gene (1110017D15Rik), transcript variant 2, mRNA.<br>XM_896996 XM_911474<br>XM_921988 XM_921993<br>XM_921997 XM_922001<br>XM_922006 XM_984085<br>XM_984115 XM_984145<br>XM_984173 XM_984201<br>XM_984239 | repression                      | -7.14983                                 |
| NM_178065.3      | 1110018G07Rik | Mus musculus RIKEN cDNA 1110018G07 gene (1110018G07Rik), mRNA.                                                                                                                                                                              | repression                      | -1.33601                                 |
| NM_025419.2      | 1110059G10Rik | Mus musculus RIKEN cDNA 1110059G10 gene (1110059G10Rik), mRNA.                                                                                                                                                                              | repression                      | -1.73355                                 |
| NM_024205.1      | 1200003C05Rik | Mus musculus RIKEN cDNA 1200003C05 gene (1200003C05Rik), mRNA.                                                                                                                                                                              | induction                       | 1.06599                                  |
| NM_026177.3      | 1200011I18Rik | Mus musculus RIKEN cDNA 1200011I18 gene (1200011I18Rik), mRNA.                                                                                                                                                                              | induction                       | 4.944165                                 |
| NM_028791.5      | 1300018I05Rik | Mus musculus RIKEN cDNA 1300018I05 gene (1300018I05Rik), mRNA.                                                                                                                                                                              | repression                      | -1.08198                                 |
| NM_027405.2      | 1700020O03Rik | Mus musculus RIKEN cDNA 1700020O03 gene (1700020O03Rik), mRNA.                                                                                                                                                                              | induction                       | 1.402095                                 |
| NM_027285.2      | 1700029I01Rik | Mus musculus RIKEN cDNA 1700029I01 gene (1700029I01Rik), mRNA.                                                                                                                                                                              | induction                       | 3.183246                                 |
| NM_026625.2      | 1700067P10Rik | Mus musculus RIKEN cDNA 1700067P10 gene (1700067P10Rik), mRNA.                                                                                                                                                                              | induction                       | 2.664977                                 |
| NM_138581.2      | 1700088E04Rik | Mus musculus RIKEN cDNA 1700088E04 gene (1700088E04Rik), mRNA.                                                                                                                                                                              | repression                      | -1.2722                                  |
| NM_197989.1      | 1810009O10Rik | Mus musculus RIKEN cDNA 1810009O10 gene (1810009O10Rik), mRNA.                                                                                                                                                                              | repression                      | -6.29994                                 |
| NM_025465.2      | 1810029B16Rik | Mus musculus RIKEN cDNA 1810029B16 gene (1810029B16Rik), mRNA.                                                                                                                                                                              | induction                       | 1.435478                                 |
| NM_025617.2      | 2210012G02Rik | Mus musculus RIKEN cDNA 2210012G02 gene (2210012G02Rik), mRNA.                                                                                                                                                                              | repression                      | -2.07431                                 |
| NM_001081961.1   | 2300005B03Rik | Mus musculus RIKEN cDNA 2300005B03 gene (2300005B03Rik), mRNA.                                                                                                                                                                              | induction                       | 3.460898                                 |
| NM_026760.2      | 2310036O22Rik | Mus musculus RIKEN cDNA 2310036O22 gene                                                                                                                                                                                                     | repression                      | -1.11215                                 |

|                |               |                                                                                      |            |          |
|----------------|---------------|--------------------------------------------------------------------------------------|------------|----------|
|                |               | (2310036O22Rik), mRNA.                                                               |            |          |
| NM_027172.2    | 2310046K01Rik | Mus musculus RIKEN cDNA 2310046K01 gene (2310046K01Rik), mRNA.                       | repression | -1.29893 |
| NM_018888.1    | 2410003P15Rik | Mus musculus RIKEN cDNA 2410003P15 gene (2410003P15Rik), mRNA.                       | repression | -1.15231 |
| NM_029354.1    | 2410018G20Rik | Mus musculus RIKEN cDNA 2410018G20 gene (2410018G20Rik), mRNA.                       | induction  | 1.258811 |
| NM_023215.3    | 2500003M10Rik | Mus musculus RIKEN cDNA 2500003M10 gene (2500003M10Rik), mRNA.                       | repression | -1.17431 |
| NM_027381.1    | 2510012J08Rik | Mus musculus RIKEN cDNA 2510012J08 gene (2510012J08Rik), mRNA.                       | repression | -1.93498 |
| NM_028130      | 2610020C11Rik |                                                                                      | repression | -1.25345 |
| NM_198411.2    | 2610204M08Rik | Mus musculus RIKEN cDNA 2610204M08 gene (2610204M08Rik), mRNA.                       | repression | -1.88621 |
| NM_028131.1    | 2610510J17Rik | Mus musculus RIKEN cDNA 2610510J17 gene (2610510J17Rik), mRNA.                       | repression | -2.80636 |
| NM_028377.1    | 2900006K08Rik | Mus musculus RIKEN cDNA 2900006K08 gene (2900006K08Rik), mRNA.                       | induction  | 2.198387 |
| NM_026064.1    | 2900073G15Rik |                                                                                      | repression | -1.32556 |
| NM_178141.2    | 3830406C13Rik | Mus musculus RIKEN cDNA 3830406C13 gene (3830406C13Rik), transcript variant 2, mRNA. | induction  | 1.104651 |
| NM_027568.2    | 4733401H21Rik | Mus musculus RIKEN cDNA 4733401H21 gene (4733401H21Rik), mRNA.                       | repression | -3.14054 |
| NM_001024606.1 | 4833426J09Rik | Mus musculus RIKEN cDNA 4833426J09 gene (4833426J09Rik), mRNA.                       | repression | -1.45167 |
| NM_183131.2    | 4930451I11Rik | Mus musculus RIKEN cDNA 4930451I11 gene (4930451I11Rik), mRNA.                       | repression | -3.01308 |
| NM_133732.2    | 4931406C07Rik | Mus musculus RIKEN cDNA 4931406C07 gene (4931406C07Rik), mRNA.                       | induction  | 1.109553 |
| NM_001082535.1 | 4933407P14Rik | Mus musculus RIKEN cDNA 4933407P14 gene (4933407P14Rik), transcript variant 2, mRNA. | induction  | 7.791707 |
| NM_025762.1    | 4933434E20Rik | Mus musculus RIKEN cDNA 4933434E20 gene (4933434E20Rik), transcript variant 1, mRNA. | induction  | 1.234404 |
| NM_025757.3    | 4933439F18Rik | Mus musculus RIKEN cDNA 4933439F18 gene (4933439F18Rik), mRNA.                       | induction  | 3.35102  |
| NM_194335.1    | 4933440H19Rik | Mus musculus RIKEN cDNA 4933440H19 gene (4933440H19Rik), mRNA.                       | repression | -2.94825 |
| NM_175533.3    | 5830411N06Rik | Mus musculus RIKEN cDNA 5830411N06 gene (5830411N06Rik), transcript variant 3, mRNA. | induction  | 3.487904 |
| NM_175232.3    | 5830427D03Rik | Mus musculus RIKEN cDNA 5830427D03 gene (5830427D03Rik), mRNA.                       | induction  | 1.261222 |
| NM_178801.2    | 6030446N20Rik | Mus musculus RIKEN cDNA 6030446N20 gene (6030446N20Rik), mRNA.                       | induction  | 4.570034 |
| NM_182995.1    | 6330503K22Rik | Mus musculus RIKEN cDNA 6330503K22 gene (6330503K22Rik), mRNA.                       | repression | -3.26013 |
| XM_001481327.1 | 6530404N21Rik | PREDICTED: Mus musculus RIKEN cDNA 6530404N21 gene (6530404N21Rik), mRNA.            | repression | -1.44053 |

|                |               |                                                                                                                          |            |          |
|----------------|---------------|--------------------------------------------------------------------------------------------------------------------------|------------|----------|
| NM_026558.2    | 6720467C03Rik | Mus musculus RIKEN cDNA 6720467C03 gene (6720467C03Rik), mRNA.                                                           | induction  | 1.223199 |
| NM_177793.3    | 9030224M15Rik | Mus musculus RIKEN cDNA 9030224M15 gene (9030224M15Rik), mRNA.                                                           | repression | -2.74401 |
| NM_001081289.1 | 9030418K01Rik | Mus musculus RIKEN cDNA 9030418K01 gene (9030418K01Rik), mRNA.                                                           | repression | -3.67125 |
| NM_133733.4    | 9030425E11Rik | Mus musculus RIKEN cDNA 9030425E11 gene (9030425E11Rik), mRNA.                                                           | induction  | 1.243173 |
| NM_172641.2    | 9930023K05Rik | Mus musculus RIKEN cDNA 9930023K05 gene (9930023K05Rik), mRNA.                                                           | induction  | 6.165399 |
| NM_001033472.2 | A830080D01Rik | Mus musculus RIKEN cDNA A830080D01 gene (A830080D01Rik), mRNA.                                                           | repression | -1.67694 |
| NM_177857      | A930010I20Rik |                                                                                                                          | repression | -1.68766 |
| NM_001013793.1 | AA388235      | Mus musculus expressed sequence AA388235 (AA388235), mRNA.                                                               | repression | -1.69787 |
| NM_175352.2    | AA407659      | Mus musculus expressed sequence AA407659 (AA407659), mRNA.                                                               | repression | -1.23052 |
| NM_134087.1    | AA409316      | Mus musculus expressed sequence AA409316 (AA409316), mRNA.                                                               | repression | -1.74131 |
| NM_001004174.1 | AA467197      | Mus musculus expressed sequence AA467197 (AA467197), mRNA.                                                               | induction  | 3.167842 |
| NM_201245.1    | AA536749      |                                                                                                                          | induction  | 5.423262 |
| NM_030210.1    | Aacs          | Mus musculus acetoacetyl-CoA synthetase (Aacs), mRNA.                                                                    | induction  | 1.564974 |
| NM_206536.1    | AB124611      | Mus musculus cDNA sequence AB124611 (AB124611), mRNA.                                                                    | repression | -3.45638 |
| NM_172961.2    | Abat          | Mus musculus 4-aminobutyrate aminotransferase (Abat), nuclear gene encoding mitochondrial protein, mRNA.                 | induction  | 2.584008 |
| NM_029600.3    | Abcc3         | Mus musculus ATP-binding cassette, sub-family C (CFTR/MRP), member 3 (Abcc3), mRNA.                                      | repression | -1.43937 |
| NM_008992.1    | Abcd4         | Mus musculus ATP-binding cassette, sub-family D (ALD), member 4 (Abcd4), mRNA.                                           | induction  | 2.114141 |
| NM_198127.1    | Abi2          | Mus musculus abl-interactor 2 (Abi2), mRNA.                                                                              | induction  | 1.245763 |
| NM_029638.1    | Abp1          | Mus musculus amiloride binding protein 1 (amine oxidase, copper-containing) (Abp1), mRNA.                                | induction  | 2.608471 |
| NM_025862.2    | Acad8         | Mus musculus acyl-Coenzyme A dehydrogenase family, member 8 (Acad8), mRNA.                                               | induction  | 2.564812 |
| NM_027286.3    | Ace2          | Mus musculus angiotensin I converting enzyme (peptidyl-dipeptidase A) 2 (Ace2), mRNA.                                    | repression | -2.66495 |
| NM_012006.2    | Acot1         | Mus musculus acyl-CoA thioesterase 1 (Acot1), mRNA.                                                                      | repression | -2.91153 |
| NM_133348.1    | Acot7         | Mus musculus acyl-CoA thioesterase 7 (Acot7), mRNA.                                                                      | repression | -1.28757 |
| NM_133348.1    | Acot7         | Mus musculus acyl-CoA thioesterase 7 (Acot7), mRNA.                                                                      | repression | -1.34058 |
| NM_080575.1    | Acss1         | Mus musculus acyl-CoA synthetase short-chain family member 1 (Acss1), nuclear gene encoding mitochondrial protein, mRNA. | repression | -1.22794 |
| NM_007392.2    | Acta2         | Mus musculus actin, alpha 2, smooth muscle, aorta (Acta2), mRNA.                                                         | induction  | 1.350132 |
| NM_031404.4    | Actl6b        | Mus musculus actin-like 6B (Actl6b), mRNA.                                                                               | induction  | 1.850259 |
| NM_175939.2    | Adam29        | Mus musculus a disintegrin and                                                                                           | repression | -2.82862 |

|                |           |                                                                                                                   |            |          |
|----------------|-----------|-------------------------------------------------------------------------------------------------------------------|------------|----------|
|                |           | metallopeptidase domain 29 (Adam29), mRNA.                                                                        |            |          |
| NM_080435.1    | Adcy4     | Mus musculus adenylate cyclase 4 (Adcy4), mRNA.                                                                   | repression | -1.81933 |
| NM_175236.3    | Adhfe1    | Mus musculus alcohol dehydrogenase, iron containing, 1 (Adhfe1), mRNA.                                            | repression | -1.90189 |
| NM_013461.3    | Adra1a    | Mus musculus adrenergic receptor, alpha 1a (Adra1a), mRNA.                                                        | repression | -1.73707 |
| NM_009633.3    | Adra2b    | Mus musculus adrenergic receptor, alpha 2b (Adra2b), mRNA.                                                        | induction  | 2.088371 |
| NM_007421.1    | Adssl1    | Mus musculus adenylosuccinate synthetase like 1 (Adssl1), mRNA.                                                   | induction  | 1.235854 |
| NM_007421.1    | Adssl1    | Mus musculus adenylosuccinate synthetase like 1 (Adssl1), mRNA.                                                   | induction  | 1.310957 |
| NM_134158.1    | AF251705  | Mus musculus cDNA sequence AF251705 (AF251705), mRNA.                                                             | induction  | 2.2947   |
| NM_016702.2    | Agxt      | Mus musculus alanine-glyoxylate aminotransferase (Agxt), mRNA.                                                    | repression | -3.92528 |
| NM_027907.1    | Agxt2l1   | Mus musculus alanine-glyoxylate aminotransferase 2-like 1 (Agxt2l1), mRNA.                                        | induction  | 4.2166   |
| NM_153577.2    | AI428936  | Mus musculus expressed sequence AI428936 (AI428936), mRNA.                                                        | induction  | 3.66122  |
| NM_001013779.1 | Aim2      | Mus musculus absent in melanoma 2 (Aim2), mRNA.                                                                   | repression | -3.61521 |
| NM_001045514.1 | Akna      | Mus musculus AT-hook transcription factor (Akna), mRNA.                                                           | repression | -1.47642 |
| NM_009022.3    | Aldh1a2   | Mus musculus aldehyde dehydrogenase family 1, subfamily A2 (Aldh1a2), mRNA.                                       | induction  | 4.669932 |
| NM_153543.1    | Aldh1l2   | Mus musculus aldehyde dehydrogenase 1 family, member L2 (Aldh1l2), mRNA.                                          | induction  | 1.306759 |
| NM_144903.2    | Aldob     | Mus musculus aldolase B, fructose-bisphosphate (Aldob), mRNA.                                                     | repression | -5.97993 |
| NM_199035.1    | Alg8      | Mus musculus asparagine-linked glycosylation 8 homolog (yeast, alpha-1,3-glucosyltransferase) (Alg8), mRNA.       | repression | -4.25437 |
| NM_007446.1    | Amy1      | Mus musculus amylase 1, salivary (Amy1), mRNA.                                                                    | repression | -1.95026 |
| NM_178642.4    | Ano1      | Mus musculus anoctamin 1, calcium activated chloride channel (Ano1), mRNA.                                        | repression | -1.36191 |
| NM_207031.1    | Ano7      | Mus musculus anoctamin 7 (Ano7), mRNA.                                                                            | repression | -2.14759 |
| NM_021392.3    | Ap4m1     | Mus musculus adaptor-related protein complex AP-4, mu 1 (Ap4m1), mRNA.                                            | repression | -1.40638 |
| NM_019456.1    | Apbb1ip   | Mus musculus amyloid beta (A4) precursor protein-binding, family B, member 1 interacting protein (Apbb1ip), mRNA. | induction  | 3.752113 |
| NM_144897.1    | Apoa1bp   | Mus musculus apolipoprotein A-I binding protein (Apoa1bp), mRNA.                                                  | repression | -1.10466 |
| NM_009695.2    | Apoc2     | Mus musculus apolipoprotein C-II (Apoc2), mRNA.                                                                   | induction  | 5.158647 |
| NM_007473.3    | Aqp7      | Mus musculus aquaporin 7 (Aqp7), mRNA.                                                                            | repression | -1.85051 |
| NM_008113.3    | Arhgdig   | Mus musculus Rho GDP dissociation inhibitor (GDI) gamma (Arhgdig), mRNA.                                          | induction  | 9.746937 |
| NM_172415.2    | Arhgef10l | Mus musculus Rho guanine nucleotide exchange factor (GEF) 10-like (Arhgef10l), mRNA.                              | induction  | 6.076377 |
| NM_177566.3    | Arhgef15  | Mus musculus Rho guanine nucleotide exchange factor (GEF) 15                                                      | induction  | 4.808905 |

|             |          |                                                                                                                       |            |          |
|-------------|----------|-----------------------------------------------------------------------------------------------------------------------|------------|----------|
|             |          | (Arhgef15), mRNA.                                                                                                     |            |          |
| NM_029103.3 | Armet    | Mus musculus arginine-rich, mutated in early stage tumors (Armet), mRNA.                                              | repression | -4.53104 |
| NM_023142.1 | Arpc1b   | Mus musculus actin related protein 2/3 complex, subunit 1B (Arpc1b), mRNA.                                            | induction  | 1.226667 |
| NM_011791.2 | Ash2l    | Mus musculus ash2 (absent, small, or homeotic)-like (Drosophila) (Ash2l), transcript variant 1, mRNA.                 | repression | -3.6907  |
| NM_023066.2 | Asph     | Mus musculus aspartate-beta-hydroxylase (Asph), transcript variant 1, mRNA.                                           | repression | -1.40108 |
| NM_175029.2 | Atg4c    | Mus musculus autophagy-related 4C (yeast) (Atg4c), mRNA.                                                              | induction  | 3.38773  |
| NM_145387.2 | Ath1l    | Mus musculus ATH1, acid trehalase-like 1 (yeast) (Ath1l), mRNA.                                                       | induction  | 1.842314 |
| NM_133764.2 | Atp6v0e2 | Mus musculus ATPase, H+ transporting, lysosomal V0 subunit E2 (Atp6v0e2), mRNA.                                       | induction  | 1.939274 |
| NM_007508.5 | Atp6v1a  | Mus musculus ATPase, H+ transporting, lysosomal V1 subunit A (Atp6v1a), mRNA.                                         | induction  | 1.530609 |
| NM_007511.2 | Atp7b    | Mus musculus ATPase, Cu++ transporting, beta polypeptide (Atp7b), mRNA.                                               | induction  | 6.567348 |
| NM_029792.1 | B3gat1   | Mus musculus beta-1,3-glucuronyltransferase 1 (glucuronosyltransferase P) (B3gat1), mRNA.                             | induction  | 3.434187 |
| NM_022305.3 | B4galt1  | Mus musculus UDP-Gal:betaGlcNAc beta 1,4- galactosyltransferase, polypeptide 1 (B4galt1), mRNA.                       | repression | -1.18164 |
| NM_019835.2 | B4galt5  | Mus musculus UDP-Gal:betaGlcNAc beta 1,4-galactosyltransferase, polypeptide 5 (B4galt5), mRNA.                        | induction  | 3.329753 |
| NM_019517.3 | Bace2    | Mus musculus beta-site APP-cleaving enzyme 2 (Bace2), mRNA.                                                           | repression | -4.04059 |
| NM_133234.1 | Bbc3     | Mus musculus BCL2 binding component 3 (Bbc3), mRNA.                                                                   | induction  | 4.941177 |
| NM_145418.3 | BC013529 | Mus musculus cDNA sequence BC013529 (BC013529), mRNA.                                                                 | induction  | 1.288096 |
| XM_980152.1 | BC016423 | PREDICTED: Mus musculus cDNA sequence BC016423, transcript variant 2 (BC016423), mRNA.                                | induction  | 1.453743 |
| NM_133214.2 | BC017612 | Mus musculus cDNA sequence BC017612 (BC017612), mRNA.                                                                 | repression | -1.25052 |
| NM_146159.1 | BC023882 | Mus musculus cDNA sequence BC023882 (BC023882), mRNA.                                                                 | induction  | 2.238829 |
| NM_177649.3 | BC034076 | Mus musculus cDNA sequence BC034076 (BC034076), mRNA.                                                                 | induction  | 1.444194 |
| NM_029815.1 | Bcas1    | Mus musculus breast carcinoma amplified sequence 1 (Bcas1), mRNA.                                                     | induction  | 2.684804 |
| NM_009739.3 | Bckdk    | Mus musculus branched chain ketoacid dehydrogenase kinase (Bckdk), nuclear gene encoding mitochondrial protein, mRNA. | repression | -1.1828  |
| NM_027208.1 | Bdh2     | Mus musculus 3-hydroxybutyrate dehydrogenase, type 2 (Bdh2), mRNA.                                                    | induction  | 1.324726 |
| NM_007540.4 | Bdnf     | Mus musculus brain derived neurotrophic factor (Bdnf), transcript variant 1, mRNA.                                    | repression | -4.4671  |
| NM_031397.2 | Bicc1    | Mus musculus bicaudal C homolog 1 (Drosophila) (Bicc1), mRNA.                                                         | induction  | 1.239356 |
| NM_028227.2 | Brp      | Mus musculus BRCA1 associated protein (Brp), mRNA.                                                                    | induction  | 2.830471 |

|                |               |                                                                                                                                                                        |            |          |
|----------------|---------------|------------------------------------------------------------------------------------------------------------------------------------------------------------------------|------------|----------|
| NM_020508.2    | Brd4          | Mus musculus bromodomain containing 4 (Brd4), transcript variant 1, mRNA.                                                                                              | repression | -3.25384 |
| NM_020508.2    | Brd4          | Mus musculus bromodomain containing 4 (Brd4), transcript variant 1, mRNA.                                                                                              | repression | -3.4775  |
| NM_028193.3    | Brf1          | Mus musculus BRF1 homolog, subunit of RNA polymerase III transcription initiation factor IIIB (S. cerevisiae) (Brf1), mRNA.                                            | repression | -1.24802 |
| NM_133195.2    | Brunol4       | Mus musculus bruno-like 4, RNA binding protein (Drosophila) (Brunol4), mRNA. XM_919930 XM_919943 XM_919956 XM_919979 XM_919988 XM_920000 XM_920011 XM_920025 XM_920039 | induction  | 6.340529 |
| NM_025840.2    | Bzw2          | Mus musculus basic leucine zipper and W2 domains 2 (Bzw2), mRNA.                                                                                                       | induction  | 1.141192 |
| NM_177818.2    | C130057D23Rik | Mus musculus RIKEN cDNA C130057D23 gene (C130057D23Rik), mRNA.                                                                                                         | induction  | 2.300436 |
| NM_030888.3    | C1qtnf3       | Mus musculus C1q and tumor necrosis factor related protein 3 (C1qtnf3), mRNA.                                                                                          | induction  | 7.221043 |
| NM_001001884.1 | C230021P08Rik | Mus musculus Riken cDNA C230021P08 gene (C230021P08Rik), mRNA.                                                                                                         | induction  | 2.443505 |
| NM_175427.2    | C630035N08Rik | Mus musculus RIKEN cDNA C630035N08 gene (C630035N08Rik), mRNA.                                                                                                         | induction  | 6.337345 |
| NM_133781.3    | Cab39         | Mus musculus calcium binding protein 39 (Cab39), mRNA.                                                                                                                 | repression | -4.6192  |
| NM_009781.2    | Cacna1c       | Mus musculus calcium channel, voltage-dependent, L type, alpha 1C subunit (Cacna1c), mRNA. XM_925104 XM_925108 XM_925111                                               | repression | -1.46594 |
| NM_009781.2    | Cacna1c       | Mus musculus calcium channel, voltage-dependent, L type, alpha 1C subunit (Cacna1c), mRNA. XM_925104 XM_925108 XM_925111                                               | repression | -1.70201 |
| NM_028500.2    | Calr3         | Mus musculus calreticulin 3 (Calr3), transcript variant 1, mRNA.                                                                                                       | repression | -4.19455 |
| NM_007602.3    | Capn5         | Mus musculus calpain 5 (Capn5), mRNA.                                                                                                                                  | repression | -1.29758 |
| NM_007607.1    | Car4          | Mus musculus carbonic anhydrase 4 (Car4), mRNA.                                                                                                                        | repression | -1.50945 |
| NM_001080126.1 | Casp8         | Mus musculus caspase 8 (Casp8), transcript variant 2, mRNA.                                                                                                            | repression | -1.67182 |
| NM_173047.2    | Cbr3          | Mus musculus carbonyl reductase 3 (Cbr3), mRNA.                                                                                                                        | repression | -1.26998 |
| NM_026681.4    | Ccdc88c       | Mus musculus coiled-coil domain containing 88C (Ccdc88c), mRNA.                                                                                                        | repression | -3.53571 |
| NM_145700.1    | Ccr1          | Mus musculus chemokine (C-C motif) receptor-like 1 (Ccr1), mRNA.                                                                                                       | induction  | 3.23115  |
| NM_010818      | Cd200         |                                                                                                                                                                        | induction  | 1.369719 |
| NM_001039149.1 | Cd226         | Mus musculus CD226 antigen (Cd226), transcript variant 2, mRNA.                                                                                                        | induction  | 4.591034 |
| NM_007642.2    | Cd28          | Mus musculus CD28 antigen (Cd28), mRNA.                                                                                                                                | repression | -5.63816 |
| NM_007646.3    | Cd38          | Mus musculus CD38 antigen (Cd38), mRNA.                                                                                                                                | induction  | 5.367832 |
| NM_001039150.1 | Cd44          | Mus musculus CD44 antigen (Cd44), transcript variant 2, mRNA.                                                                                                          | repression | -3.75439 |
| NM_007653.3    | Cd63          | Mus musculus CD63 antigen (Cd63), transcript variant 2, mRNA.                                                                                                          | repression | -1.35758 |



|             |         |                                                                                              |            |          |
|-------------|---------|----------------------------------------------------------------------------------------------|------------|----------|
| NM_172587.2 | Cdc14b  | Mus musculus CDC14 cell division cycle 14 homolog B ( <i>S. cerevisiae</i> ) (Cdc14b), mRNA. | induction  | 1.300399 |
| NM_025950.2 | Cdc3711 | Mus musculus cell division cycle 37 homolog ( <i>S. cerevisiae</i> )-like 1 (Cdc3711), mRNA. | induction  | 1.504572 |
| NM_007669.3 | Cdkn1a  | Mus musculus cyclin-dependent kinase inhibitor 1A (P21) (Cdkn1a), mRNA.                      | induction  | 1.568352 |
| NM_007671.2 | Cdkn2c  | Mus musculus cyclin-dependent kinase inhibitor 2C (p18, inhibits CDK4) (Cdkn2c), mRNA.       | repression | -1.44101 |
| NM_009880.2 | Cdx1    | Mus musculus caudal type homeo box 1 (Cdx1), mRNA.                                           | repression | -4.7149  |
| NM_144815.2 | Cecr5   | Mus musculus cat eye syndrome chromosome region, candidate 5 homolog (human) (Cecr5), mRNA.  | induction  | 3.020014 |
| NM_025495.1 | Cenpp   | Mus musculus centromere protein P (Cenpp), mRNA.                                             | repression | -1.26006 |
| XM_981952.1 | Cep110  | PREDICTED: Mus musculus centrosomal protein 110 (Cep110), mRNA.                              | induction  | 4.89387  |
| NM_203491.1 | Chrm2   | Mus musculus cholinergic receptor, muscarinic 2, cardiac (Chrm2), mRNA.                      | induction  | 1.978903 |
| NM_015730.4 | Chrna4  | Mus musculus cholinergic receptor, nicotinic, alpha polypeptide 4 (Chrna4), mRNA.            | induction  | 2.08186  |
| NM_018777.2 | Cldn6   | Mus musculus claudin 6 (Cldn6), mRNA.                                                        | induction  | 4.258369 |
| NM_020293.2 | Cldn9   | Mus musculus claudin 9 (Cldn9), mRNA.                                                        | induction  | 1.777833 |
| NM_153506.3 | Clec2e  | Mus musculus C-type lectin domain family 2, member e (Clec2e), mRNA.                         | induction  | 6.087226 |
| NM_010819.3 | Clec4d  | Mus musculus C-type lectin domain family 4, member d (Clec4d), mRNA.                         | repression | -3.40622 |
| NM_172732.2 | Clec9a  | Mus musculus C-type lectin domain family 9, member a (Clec9a), mRNA.                         | repression | -7.77104 |
| NM_019948.1 | Clecsf9 |                                                                                              | repression | -8.50193 |
| NM_007713.3 | Clk3    | Mus musculus CDC-like kinase 3 (Clk3), mRNA.                                                 | repression | -1.2373  |
| NM_007715.5 | Clock   | Mus musculus circadian locomoter output cycles kaput (Clock), mRNA.                          | repression | -1.1503  |
| NM_009918.1 | Cnga3   | Mus musculus cyclic nucleotide gated channel alpha 3 (Cnga3), mRNA.                          | repression | -3.33762 |
| NM_028082.1 | Cnot2   | Mus musculus CCR4-NOT transcription complex, subunit 2 (Cnot2), transcript variant 3, mRNA.  | repression | -1.2773  |
| NM_016782.2 | Cntnap1 | Mus musculus contactin associated protein-like 1 (Cntnap1), mRNA.                            | induction  | 5.140672 |
| NM_027896.4 | Coasy   | Mus musculus Coenzyme A synthase (Coasy), nuclear gene encoding mitochondrial protein, mRNA. | repression | -1.33008 |
| NM_172496.2 | Cobl    | Mus musculus cordon-bleu (Cobl), mRNA.                                                       | induction  | 7.484085 |
| NM_009926.1 | Col11a2 | Mus musculus collagen, type XI, alpha 2 (Col11a2), mRNA.                                     | induction  | 4.864747 |
| NM_181277.2 | Col14a1 | Mus musculus collagen, type XIV, alpha 1 (Col14a1), mRNA.                                    | induction  | 1.692125 |
| NM_009931.1 | Col4a1  | Mus musculus procollagen, type IV, alpha 1 (Col4a1), mRNA.                                   | induction  | 1.26898  |
| NM_007737.2 | Col5a2  | Mus musculus collagen, type V, alpha 2 (Col5a2), mRNA.                                       | induction  | 7.110158 |
| NM_007740.2 | Col9a1  | Mus musculus collagen, type IX, alpha 1 (Col9a1), mRNA.                                      | induction  | 5.023568 |
| NM_016685.1 | Comp    | Mus musculus cartilage oligomeric                                                            | induction  | 1.377543 |

|                |               |                                                                                        |            |          |
|----------------|---------------|----------------------------------------------------------------------------------------|------------|----------|
|                |               | matrix protein (Comp), mRNA.                                                           |            |          |
| NM_009898.2    | Coro1a        | Mus musculus coronin, actin binding protein 1A (Coro1a), mRNA.                         | induction  | 1.473685 |
| NM_153507.2    | Cpne2         | Mus musculus copine II (Cpne2), mRNA.                                                  | induction  | 1.753603 |
| NM_021449.2    | Crbn          | Mus musculus cereblon (Crbn), transcript variant 1, mRNA.                              | repression | -1.17351 |
| NM_013498.1    | Crem          | Mus musculus cAMP responsive element modulator (Crem), mRNA.                           | repression | -3.93641 |
| NM_015800.2    | Crim1         | Mus musculus cysteine rich transmembrane BMP regulator 1 (chordin like) (Crim1), mRNA. | repression | -1.19257 |
| NM_173863.2    | Crtc3         | Mus musculus CREB regulated transcription coactivator 3 (Crtc3), mRNA.                 | induction  | 1.226006 |
| NM_001033638.1 | Crxos1        | Mus musculus Crx opposite strand transcript 1 (Crxos1), mRNA.                          | induction  | 7.525637 |
| NM_030004.2    | Cryl1         | Mus musculus crystallin, lambda 1 (Cryl1), mRNA.                                       | repression | -1.35195 |
| NM_027945.1    | Csl           | Mus musculus citrate synthase like (Csl), mRNA.                                        | induction  | 1.437527 |
| NM_021405.2    | Cst10         | Mus musculus cystatin 10 (chondrocytes) (Cst10), mRNA.                                 | induction  | 6.409717 |
| NM_001004367.2 | Cxxc4         | Mus musculus CXXC finger 4 (Cxxc4), mRNA.                                              | repression | -4.11259 |
| NM_007808.3    | Cycs          | Mus musculus cytochrome c, somatic (Cycs), mRNA.                                       | induction  | 1.614299 |
| NM_133769.2    | Cyfip2        | Mus musculus cytoplasmic FMR1 interacting protein 2 (Cyfip2), mRNA.                    | induction  | 1.31783  |
| NM_030013.2    | Cyp20a1       | Mus musculus cytochrome P450, family 20, subfamily A, polypeptide 1 (Cyp20a1), mRNA.   | repression | -1.97652 |
| NM_009996.2    | Cyp24a1       |                                                                                        | repression | -1.99418 |
| NM_010000.2    | Cyp2b9        | Mus musculus cytochrome P450, family 2, subfamily b, polypeptide 9 (Cyp2b9), mRNA.     | induction  | 5.526331 |
| NM_053078.3    | D0H4S114      | Mus musculus DNA segment, human D4S114 (D0H4S114), mRNA.                               | induction  | 1.249334 |
| NM_001013379.2 | D10627        | Mus musculus cDNA sequence D10627 (D10627), mRNA.                                      | induction  | 1.519086 |
| NM_029648.3    | D19ErtD737e   | Mus musculus DNA segment, Chr 19, ERATO Doi 737, expressed (D19ErtD737e), mRNA.        | induction  | 2.464841 |
| NM_033077.2    | D1Pas1        | Mus musculus DNA segment, Chr 1, Pasteur Institute 1 (D1Pas1), mRNA.                   | induction  | 1.998827 |
| NM_178724.2    | D230010M03Rik | Mus musculus RIKEN cDNA D230010M03 gene (D230010M03Rik), mRNA.                         | induction  | 3.26703  |
| NM_001081022.1 | D430042O09Rik | Mus musculus RIKEN cDNA D430042O09 gene (D430042O09Rik), mRNA.                         | repression | -1.41197 |
| NM_177135.2    | D830030K20Rik | Mus musculus RIKEN cDNA D830030K20 gene (D830030K20Rik), mRNA.                         | repression | -1.57161 |
| NM_026378.3    | Dalrd3        | Mus musculus DALR anticodon binding domain containing 3 (Dalrd3), mRNA.                | repression | -1.37187 |
| NM_134062.1    | Dapk1         | Mus musculus death associated protein kinase 1 (Dapk1), transcript variant 2, mRNA.    | repression | -1.30951 |
| NM_010031.2    | Defa1         | Mus musculus defensin, alpha 1 (Defa1), mRNA.                                          | induction  | 6.868286 |
| NM_139225.1    | Defb10        | Mus musculus defensin beta 10 (Defb10), mRNA.                                          | repression | -4.37691 |
| NM_021428.4    | Dexi          | Mus musculus dexamethasone-induced transcript (Dexi), mRNA.                            | repression | -1.19507 |
| NM_138650.1    | Dgkg          | Mus musculus diacylglycerol kinase, gamma (Dgkg), mRNA.                                | repression | -1.81856 |

|                |               |                                                                                      |            |          |
|----------------|---------------|--------------------------------------------------------------------------------------|------------|----------|
| NM_010049.3    | Dhfr          | Mus musculus dihydrofolate reductase (Dhfr), mRNA.                                   | repression | -4.60347 |
| NM_001039514.1 | Dhps          | Mus musculus deoxyhypusine synthase (Dhps), mRNA.                                    | repression | -1.28378 |
| NM_027790.1    | Dhrs2         | Mus musculus dehydrogenase/reductase member 2 (Dhrs2), mRNA.                         | induction  | 4.71599  |
| NM_172594.2    | Dhx29         | Mus musculus DEAH (Asp-Glu-Ala-His) box polypeptide 29 (Dhx29), mRNA.                | repression | -1.41105 |
| NM_007865.2    | Dll1          | Mus musculus delta-like 1 (Drosophila) (Dll1), mRNA.                                 | induction  | 1.405459 |
| NM_172899.2    | Dmkn          | Mus musculus dermokine (Dmkn), transcript variant 2, mRNA.                           | induction  | 4.335472 |
| NM_010058.1    | Dmwd          | Mus musculus dystrophia myotonica-containing WD repeat motif (Dmwd), mRNA.           | repression | -1.23478 |
| NM_023646.3    | Dnaja3        | Mus musculus DnaJ (Hsp40) homolog, subfamily A, member 3 (Dnaja3), mRNA.             | repression | -1.23409 |
| NM_023646.3    | Dnaja3        | Mus musculus DnaJ (Hsp40) homolog, subfamily A, member 3 (Dnaja3), mRNA.             | repression | -4.81868 |
| NM_172704.2    | Dnajc11       | Mus musculus DnaJ (Hsp40) homolog, subfamily C, member 11 (Dnajc11), mRNA.           | repression | -3.76508 |
| NM_153413.2    | Dock3         | Mus musculus dedicator of cytokinesis 3 (Dock3), mRNA.                               | repression | -4.82875 |
| NM_028785.3    | Dock8         | Mus musculus dedicator of cytokinesis 8 (Dock8), mRNA.                               | induction  | 1.499161 |
| NM_020329.3    | Dolpp1        | Mus musculus dolichyl pyrophosphate phosphatase 1 (Dolpp1), mRNA.                    | repression | -1.96793 |
| NM_015761.1    | Dos           | Mus musculus downstream of Stk11 (Dos), mRNA.                                        | induction  | 2.729667 |
| NM_026344.3    | Dph2          | Mus musculus DPH2 homolog (S. cerevisiae) (Dph2), mRNA.                              | repression | -3.58632 |
| NM_011993.2    | Dpysl4        | Mus musculus dihydropyrimidinase-like 4 (Dpysl4), mRNA.                              | induction  | 6.334981 |
| NM_181682.1    | Dsg1b         | Mus musculus desmoglein 1 beta (Dsg1b), mRNA.                                        | induction  | 2.18976  |
| NM_207650.3    | Dtna          | Mus musculus dystrobrevin alpha (Dtna), transcript variant 1, mRNA.                  | repression | -2.68019 |
| NM_010089.3    | Dub2          | Mus musculus deubiquitinating enzyme 2 (Dub2), mRNA.                                 | induction  | 4.117812 |
| NM_010091.2    | Dvl1          |                                                                                      | induction  | 1.222706 |
| NM_001081756.1 | E030049G20Rik | Mus musculus RIKEN cDNA E030049G20 gene (E030049G20Rik), transcript variant 1, mRNA. | induction  | 5.488727 |
| NM_172726.3    | E130309D02Rik | Mus musculus RIKEN cDNA E130309D02 gene (E130309D02Rik), mRNA.                       | repression | -3.21128 |
| NM_028932.3    | Eaf1          | Mus musculus ELL associated factor 1 (Eaf1), mRNA.                                   | repression | -3.95473 |
| NM_007899.1    | Ecm1          | Mus musculus extracellular matrix protein 1 (Ecm1), mRNA.                            | induction  | 1.598377 |
| NM_207241.1    | EG237009      | Mus musculus predicted gene, EG237009 (EG237009), mRNA.                              | induction  | 2.721187 |
| NM_177810.2    | EG328264      | Mus musculus predicted gene, EG328264 (EG328264), mRNA.                              | induction  | 6.893631 |
| NR_002869.1    | EG432986      | Mus musculus predicted gene, EG432986 (EG432986), non-coding RNA.                    | repression | -8.22167 |
| NM_178748.5    | Egflam        | Mus musculus EGF-like, fibronectin type III and laminin G domains (Egflam), mRNA.    | repression | -4.65337 |
| NM_007913.5    | Egr1          | Mus musculus early growth response                                                   | induction  | 1.397899 |

|                |          |                                                                                              |            |          |
|----------------|----------|----------------------------------------------------------------------------------------------|------------|----------|
|                |          | 1 (Egr1), mRNA.                                                                              |            |          |
| NM_172265.1    | Eif2b5   | Mus musculus eukaryotic translation initiation factor 2B, subunit 5 epsilon (Eif2b5), mRNA.  | repression | -1.15943 |
| NM_138669.1    | Eif4a3   | Mus musculus eukaryotic translation initiation factor 4A, isoform 3 (Eif4a3), mRNA.          | repression | -1.06089 |
| NM_007923.1    | Elk4     | Mus musculus ELK4, member of ETS oncogene family (Elk4), mRNA.                               | induction  | 3.792088 |
| NM_144917.4    | Elmod3   | Mus musculus ELMO/CED-12 domain containing 3 (Elmod3), mRNA.                                 | repression | -2.2064  |
| NM_013813.1    | Epb4.1l3 | Mus musculus erythrocyte protein band 4.1-like 3 (Epb4.1l3), mRNA.                           | induction  | 1.653402 |
| NM_027497.2    | Epc1     | Mus musculus enhancer of polycomb homolog 1 (Drosophila) (Epc1), transcript variant 2, mRNA. | induction  | 3.400297 |
| NM_013848.1    | Ermap    | Mus musculus erythroblast membrane-associated protein (Ermap), mRNA.                         | repression | -2.41636 |
| NM_016903.4    | Esd      | Mus musculus esterase D/formylglutathione hydrolase (Esd), mRNA.                             | induction  | 2.520722 |
| NM_011809.2    | Ets2     | Mus musculus E26 avian leukemia oncogene 2, 3' domain (Ets2), mRNA.                          | repression | -1.21008 |
| NM_027698.4    | Exod1    | Mus musculus exonuclease domain containing 1 (Exod1), mRNA.                                  | repression | -5.97321 |
| NM_001081188.1 | Exosc7   | Mus musculus exosome component 7 (Exosc7), mRNA.                                             | repression | -1.23259 |
| NM_018788.2    | Extl3    | Mus musculus exostosins (multiple)-like 3 (Extl3), mRNA.                                     | repression | -2.14902 |
| NM_007974.2    | F2r1     | Mus musculus coagulation factor II (thrombin) receptor-like 1 (F2r1), mRNA.                  | repression | -3.77341 |
| NM_021272.2    | Fabp7    |                                                                                              | induction  | 4.026491 |
| NM_024203.3    | Fam120b  | Mus musculus family with sequence similarity 120, member B (Fam120b), mRNA.                  | induction  | 1.219691 |
| NM_007988.3    | Fasn     | Mus musculus fatty acid synthase (Fasn), mRNA.                                               | repression | -3.90454 |
| NM_177244.3    | Fastkd1  | Mus musculus FAST kinase domains 1 (Fastkd1), mRNA.                                          | repression | -1.23275 |
| NM_013911.2    | Fbxl12   | Mus musculus F-box and leucine-rich repeat protein 12 (Fbxl12), transcript variant 1, mRNA.  | repression | -1.386   |
| NM_133765.2    | Fbxo31   | Mus musculus F-box protein 31 (Fbxo31), mRNA.                                                | repression | -1.29424 |
| NM_025386.2    | Fbxo36   | Mus musculus F-box protein 36 (Fbxo36), mRNA.                                                | repression | -3.52347 |
| NM_010193.3    | Fem1b    | Mus musculus feminization 1 homolog b (C. elegans) (Fem1b), mRNA.                            | repression | -1.12922 |
| NM_183171.1    | Fez1     | Mus musculus fasciculation and elongation protein zeta 1 (zygin I) (Fez1), mRNA.             | repression | -1.38079 |
| NM_053072.2    | Fgd6     | Mus musculus FYVE, RhoGEF and PH domain containing 6 (Fgd6), mRNA.                           | induction  | 1.176495 |
| NM_177699.2    | Fhod1    | Mus musculus formin homology 2 domain containing 1 (Fhod1), mRNA.                            | repression | -1.59244 |
| NM_010220.2    | Fkbp5    | Mus musculus FK506 binding protein 5 (Fkbp5), mRNA.                                          | repression | -1.99081 |
| NM_010231.2    | Fmo1     | Mus musculus flavin containing monooxygenase 1 (Fmo1), mRNA.                                 | repression | -1.18016 |
| NM_010232.3    | Fmo5     | Mus musculus flavin containing monooxygenase 5 (Fmo5), mRNA.                                 | repression | -1.61777 |
| NM_018828.2    | Fnbp4    | Mus musculus formin binding protein                                                          | induction  | 4.015383 |

|                |         |                                                                                                      |            |          |
|----------------|---------|------------------------------------------------------------------------------------------------------|------------|----------|
|                |         | 4 (Fnbp4), mRNA.                                                                                     |            |          |
| NM_054039.1    | Foxp3   | Mus musculus forkhead box P3 (Foxp3), mRNA.                                                          | induction  | 1.47374  |
| NM_001017983.1 | Foxred2 | Mus musculus FAD-dependent oxidoreductase domain containing 2 (Foxred2), mRNA.                       | induction  | 5.226151 |
| NM_011356.4    | Frzb    | Mus musculus frizzled-related protein (Frzb), mRNA.                                                  | repression | -1.69033 |
| NM_022007.1    | Fxyd7   | Mus musculus FXYD domain-containing ion transport regulator 7 (Fxyd7), mRNA.                         | induction  | 4.574082 |
| NM_013716.2    | G3bp1   | Mus musculus Ras-GTPase-activating protein SH3-domain binding protein 1 (G3bp1), mRNA.               | repression | -1.35144 |
| NM_021356.2    | Gab1    | Mus musculus growth factor receptor bound protein 2-associated protein 1 (Gab1), mRNA.               | repression | -1.10215 |
| NM_029885.1    | Gabpb2  | Mus musculus GA repeat binding protein, beta 2 (Gabpb2), transcript variant 1, mRNA.                 | induction  | 3.94905  |
| NM_008072.1    | Gabrd   | Mus musculus gamma-aminobutyric acid (GABA-A) receptor, subunit delta (Gabrd), mRNA.                 | induction  | 4.468027 |
| NM_146017.3    | Gabrp   | Mus musculus gamma-aminobutyric acid (GABA-A) receptor, pi (Gabrp), mRNA.                            | induction  | 6.050682 |
| NM_025709.2    | Gapvd1  | Mus musculus GTPase activating protein and VPS9 domains 1 (Gapvd1), mRNA.                            | repression | -1.2852  |
| NM_030719.3    | Gats    | Mus musculus opposite strand transcription unit to Stag3 (Gats), mRNA.                               | induction  | 1.198658 |
| NM_177367.2    | Gemin4  | Mus musculus gem (nuclear organelle) associated protein 4 (Gemin4), mRNA.                            | repression | -1.60829 |
| NM_010285.2    | Ghrh    | Mus musculus growth hormone releasing hormone (Ghrh), mRNA.                                          | induction  | 4.078378 |
| NM_174990.3    | Gimap4  | Mus musculus GTPase, IMAP family member 4 (Gimap4), transcript variant 1, mRNA.                      | repression | -2.73977 |
| NM_031184.3    | Glis2   | Mus musculus GLIS family zinc finger 2 (Glis2), mRNA.                                                | induction  | 4.333859 |
| NM_001033302.1 | Gm129   | Mus musculus gene model 129, (NCBI) (Gm129), mRNA. XM_907670 XM_920513 XM_920520 XM_920527 XM_920533 | repression | -1.2969  |
| NM_001005422.1 | Gm1574  | Mus musculus gene model 1574, (NCBI) (Gm1574), mRNA.                                                 | repression | -5.6851  |
| NM_001033403.1 | Gm1968  | Mus musculus gene model 1968, (NCBI) (Gm1968), mRNA.                                                 | induction  | 3.646516 |
| NM_001033404.2 | Gm813   | Mus musculus gene model 813, (NCBI) (Gm813), mRNA.                                                   | induction  | 1.557748 |
| NM_011818.2    | Gmcl1   | Mus musculus germ cell-less homolog 1 (Drosophila) (Gmcl1), mRNA.                                    | repression | -1.24484 |
| NM_001039192.1 | Gmfg    | Mus musculus glia maturation factor, gamma (Gmfg), transcript variant 2, mRNA.                       | repression | -4.44232 |
| NM_010301.1    | Gna11   |                                                                                                      | induction  | 1.45811  |
| NM_008141.2    | Gnat2   | Mus musculus guanine nucleotide binding protein, alpha transducing 2 (Gnat2), mRNA.                  | repression | -9.38813 |
| NM_001038015.1 | Gnpda2  | Mus musculus glucosamine-6-phosphate deaminase 2 (Gnpda2), mRNA.                                     | induction  | 1.427745 |
| NM_010325.2    | Got2    | Mus musculus glutamate oxaloacetate transaminase 2,                                                  | repression | -1.13597 |

|             |           |                                                                                                    |            |          |
|-------------|-----------|----------------------------------------------------------------------------------------------------|------------|----------|
|             |           | mitochondrial (Got2), nuclear gene encoding mitochondrial protein, mRNA.                           |            |          |
| NM_172876.2 | Gpatch3   | Mus musculus G patch domain containing 3 (Gpatch3), mRNA.                                          | induction  | 2.904319 |
| NM_007412.2 | Gpr182    | Mus musculus G protein-coupled receptor 182 (Gpr182), mRNA.                                        | repression | -1.68732 |
| NM_175470.3 | Gpr61     | Mus musculus G protein-coupled receptor 61 (Gpr61), mRNA.                                          | induction  | 9.955912 |
| NM_145370.1 | Gps1      | Mus musculus G protein pathway suppressor 1 (Gps1), mRNA.                                          | repression | -3.41761 |
| NM_153410.2 | Gpsm1     | Mus musculus G-protein signalling modulator 1 (AGS3-like, <i>C. elegans</i> ) (Gpsm1), mRNA.       | repression | -1.3223  |
| NM_011825.1 | Grem2     | Mus musculus gremlin 2 homolog, cysteine knot superfamily ( <i>Xenopus laevis</i> ) (Grem2), mRNA. | induction  | 2.028484 |
| NM_008169.1 | Grin1     | Mus musculus glutamate receptor, ionotropic, NMDA1 (zeta 1) (Grin1), mRNA.                         | induction  | 3.120982 |
| NM_008180.1 | Gss       | Mus musculus glutathione synthetase (Gss), mRNA.                                                   | repression | -1.32317 |
| NM_010358.4 | Gstm1     | Mus musculus glutathione S-transferase, mu 1 (Gstm1), mRNA.                                        | repression | -1.38687 |
| NM_008183.2 | Gstm2     | Mus musculus glutathione S-transferase, mu 2 (Gstm2), mRNA.                                        | repression | -1.55646 |
| NM_010363.3 | Gstz1     | Mus musculus glutathione transferase zeta 1 (maleylacetoacetate isomerase) (Gstz1), mRNA.          | repression | -1.25456 |
| NM_008190.1 | Guca2a    | Mus musculus guanylate cyclase activator 2a (guanylin) (Guca2a), mRNA.                             | induction  | 2.657497 |
| NM_030678.3 | Gys1      | Mus musculus glycogen synthase 1, muscle (Gys1), mRNA.                                             | repression | -1.66235 |
| NM_173371.3 | H6pd      | Mus musculus hexose-6-phosphate dehydrogenase (glucose 1-dehydrogenase) (H6pd), mRNA.              | repression | -1.21425 |
| NM_019986   | Habp4     |                                                                                                    | induction  | 2.27655  |
| NM_177900.4 | Hapln4    | Mus musculus hyaluronan and proteoglycan link protein 4 (Hapln4), mRNA.                            | induction  | 3.0567   |
| NM_011827.2 | Hcst      | Mus musculus hematopoietic cell signal transducer (Hcst), mRNA.                                    | induction  | 1.28849  |
| NM_008232.1 | Hdgfl1    | Mus musculus hepatoma derived growth factor-like 1 (Hdgfl1), mRNA.                                 | induction  | 4.028272 |
| NM_026108.2 | Hdhd1a    | Mus musculus haloacid dehalogenase-like hydrolase domain (Hdhd1a), mRNA.                           | repression | -3.64849 |
| NM_013546.2 | Hebp1     | Mus musculus heme binding protein 1 (Hebp1), mRNA.                                                 | repression | -1.32137 |
| NM_026101.2 | Herc4     | Mus musculus hect domain and RLD 4 (Herc4), mRNA.                                                  | induction  | 1.206677 |
| NM_010419.4 | Hes5      | Mus musculus hairy and enhancer of split 5 ( <i>Drosophila</i> ) (Hes5), mRNA.                     | induction  | 3.569286 |
| NM_010420.1 | Hesx1     | Mus musculus homeo box gene expressed in ES cells (Hesx1), mRNA.                                   | repression | -2.98661 |
| NM_027126.2 | Hfe2      | Mus musculus hemochromatosis type 2 (juvenile) (human homolog) (Hfe2), mRNA.                       | induction  | 1.639743 |
| NM_144881.2 | Hhat      | Mus musculus hedgehog acyltransferase (Hhat), mRNA.                                                | induction  | 2.656831 |
| NM_010435.1 | Hira      |                                                                                                    | repression | -1.58278 |
| NM_175665.1 | Hist1h2bk | Mus musculus histone cluster 1, H2bk (Hist1h2bk), mRNA.                                            | induction  | 1.285991 |
| NM_206882.1 | Hist3h2bb | Mus musculus histone cluster 3, H2bb (Hist3h2bb), mRNA.                                            | repression | -2.91392 |

|                |        |                                                                                                                            |            |          |
|----------------|--------|----------------------------------------------------------------------------------------------------------------------------|------------|----------|
| NM_010439.3    | Hmgb1  | Mus musculus high mobility group box 1 (Hmgb1), mRNA.                                                                      | repression | -3       |
| NM_008256.3    | Hmgcs2 | Mus musculus 3-hydroxy-3-methylglutaryl-Coenzyme A synthase 2 (Hmgcs2), nuclear gene encoding mitochondrial protein, mRNA. | repression | -1.99054 |
| NM_026122.3    | Hmgn3  | Mus musculus high mobility group nucleosomal binding domain 3 (Hmgn3), transcript variant 1, mRNA.                         | induction  | 1.14009  |
| NM_010458.2    | Hoxb3  | Mus musculus homeo box B3 (Hoxb3), transcript variant 2, mRNA.                                                             | repression | -4.08946 |
| NM_010470.1    | Hp1bp3 | Mus musculus heterochromatin protein 1, binding protein 3 (Hp1bp3), mRNA.                                                  | repression | -1.06021 |
| NM_021877.2    | Hr     | Mus musculus hairless (Hr), mRNA.                                                                                          | repression | -1.72837 |
| NM_001002012.1 | Hspa2  | Mus musculus heat shock protein 2 (Hspa2), transcript variant 2, mRNA.                                                     | induction  | 1.250415 |
| NM_008318.1    | lbsp   | Mus musculus integrin binding sialoprotein (lbsp), mRNA.                                                                   | induction  | 3.012645 |
| NM_008318.1    | lbsp   | Mus musculus integrin binding sialoprotein (lbsp), mRNA.                                                                   | induction  | 5.23682  |
| NM_173011.1    | ldh2   | Mus musculus isocitrate dehydrogenase 2 (NADP+), mitochondrial (ldh2), nuclear gene encoding mitochondrial protein, mRNA.  | repression | -1.13405 |
| NM_172648.3    | lfi205 | Mus musculus interferon activated gene 205 (lfi205), mRNA.                                                                 | repression | -3.97919 |
| NM_177361.2    | lfna12 | Mus musculus interferon alpha 12 (lfna12), mRNA.                                                                           | repression | -7.21424 |
| NM_009879.2    | lft81  | Mus musculus intraflagellar transport 81 homolog (Chlamydomonas) (lft81), mRNA.                                            | repression | -1.31708 |
| NM_018741.1    | lgfbp1 | Mus musculus insulin-like growth factor binding protein-like 1 (lgfbp1), mRNA.                                             | induction  | 4.141034 |
| NM_011879.1    | lk     | Mus musculus IK cytokine (lk), mRNA.                                                                                       | repression | -1.30202 |
| NM_001025597.1 | lkzf1  | Mus musculus IKAROS family zinc finger 1 (lkzf1), transcript variant 1, mRNA.                                              | repression | -3.89923 |
| NM_010552.3    | ll17a  | Mus musculus interleukin 17A (ll17a), mRNA.                                                                                | induction  | 4.575752 |
| NM_173751.3    | llvbl  | Mus musculus ilvB (bacterial acetolactate synthase)-like (llvbl), mRNA.                                                    | repression | -1.27319 |
| NM_133345.2    | lng4   | Mus musculus inhibitor of growth family, member 4 (lng4), mRNA.                                                            | repression | -1.2251  |
| NM_009349.1    | lnmt   | Mus musculus indolethylamine N-methyltransferase (lnmt), mRNA.                                                             | repression | -2.75463 |
| NM_033134.2    | lnpp5e | Mus musculus inositol polyphosphate-5-phosphatase E (lnpp5e), mRNA.                                                        | repression | -1.31821 |
| NM_010567.1    | lnpp1  | Mus musculus inositol polyphosphate phosphatase-like 1 (lnpp1), mRNA.                                                      | repression | -1.14757 |
| NM_010569.2    | lnvs   |                                                                                                                            | repression | -3.846   |
| NM_016849.3    | lrf3   | Mus musculus interferon regulatory factor 3 (lrf3), mRNA.                                                                  | induction  | 1.200197 |
| NM_027397.3    | lsl2   | Mus musculus insulin related protein 2 (islet 2) (lsl2), mRNA.                                                             | repression | -4.31131 |
| NM_010575.1    | ltga2b | Mus musculus integrin alpha 2b (ltga2b), mRNA.                                                                             | repression | -4.28597 |
| NM_019826.3    | lvd    | Mus musculus isovaleryl coenzyme A dehydrogenase (lvd), nuclear gene encoding mitochondrial protein, mRNA.                 | repression | -1.32428 |
| NM_030697.2    | Kank3  | Mus musculus KN motif and ankyrin repeat domains 3 (Kank3), mRNA.                                                          | repression | -1.41873 |

|                |              |                                                                                                                     |            |          |
|----------------|--------------|---------------------------------------------------------------------------------------------------------------------|------------|----------|
| NM_001081140.1 | Kcna10       | Mus musculus potassium voltage-gated channel, shaker-related subfamily, member 10 (Kcna10), mRNA.                   | induction  | 4.723537 |
| NM_021275.3    | Kcna4        | Mus musculus potassium voltage-gated channel, shaker-related subfamily, member 4 (Kcna4), mRNA.                     | induction  | 1.985084 |
| NM_013568.4    | Kcna6        | Mus musculus potassium voltage-gated channel, shaker-related, subfamily, member 6 (Kcna6), mRNA.                    | induction  | 4.566103 |
| NM_027398.2    | Kcnp1        | Mus musculus Kv channel-interacting protein 1 (Kcnp1), mRNA.                                                        | repression | -4.03004 |
| NM_145963.1    | Kcnj14       | Mus musculus potassium inwardly-rectifying channel, subfamily J, member 14 (Kcnj14), mRNA.                          | repression | -5.83606 |
| NM_001025585.2 | Kcnj6        | Mus musculus potassium inwardly-rectifying channel, subfamily J, member 6 (Kcnj6), transcript variant Girk2B, mRNA. | repression | -5.48343 |
| NM_001030292.1 | Kcnk15       | Mus musculus potassium channel, subfamily K, member 15 (Kcnk15), mRNA.                                              | repression | -3.6046  |
| NM_021542.4    | Kcnk5        | Mus musculus potassium channel, subfamily K, member 5 (Kcnk5), mRNA.                                                | repression | -1.88043 |
| NM_183179.1    | Kcnv2        | Mus musculus potassium channel, subfamily V, member 2 (Kcnv2), mRNA.                                                | repression | -2.34555 |
| NM_010612.2    | Kdr          | Mus musculus kinase insert domain protein receptor (Kdr), mRNA.                                                     | repression | -8.66373 |
| NM_016679.2    | Keap1        | Mus musculus kelch-like ECH-associated protein 1 (Keap1), mRNA.                                                     | repression | -1.24961 |
| NM_001025360.2 | Klc1         | Mus musculus kinesin light chain 1 (Klc1), transcript variant d, mRNA. XM_992298                                    | induction  | 1.262911 |
| NM_145605.1    | Klhdc4       | Mus musculus kelch domain containing 4 (Klhdc4), mRNA.                                                              | induction  | 2.838038 |
| NM_027551.2    | Klhl30       | Mus musculus kelch-like 30 (Drosophila) (Klhl30), mRNA.                                                             | induction  | 1.114172 |
| NM_133712.2    | Klk10        | Mus musculus kallikrein related-peptidase 10 (Klk10), mRNA.                                                         | repression | -1.6281  |
| NM_008455.1    | Klkb1        | Mus musculus kallikrein B, plasma 1 (Klkb1), mRNA.                                                                  | induction  | 3.098369 |
| NM_010661.2    | Krt12        | Mus musculus keratin 12 (Krt12), mRNA.                                                                              | repression | -4.78328 |
| NM_133357.1    | Krt75        | Mus musculus keratin 75 (Krt75), mRNA.                                                                              | induction  | 6.488473 |
| NM_025410.2    | Lage3        | Mus musculus L antigen family, member 3 (Lage3), mRNA.                                                              | repression | -1.22377 |
| NM_173414.2    | Lancl3       | Mus musculus LanC lantibiotic synthetase component C-like 3 (bacterial) (Lancl3), mRNA.                             | induction  | 7.848807 |
| NM_172842.2    | Lax1         | Mus musculus lymphocyte transmembrane adaptor 1 (Lax1), mRNA.                                                       | repression | -2.78744 |
| NM_134093.1    | Letmd1       | Mus musculus LETM1 domain containing 1 (Letmd1), mRNA.                                                              | repression | -1.38412 |
| NM_145833.1    | Lin28        | Mus musculus lin-28 homolog (C. elegans) (Lin28), mRNA.                                                             | induction  | 2.2779   |
| NM_011698.1    | Lin7b        | Mus musculus lin-7 homolog B (C. elegans) (Lin7b), mRNA.                                                            | repression | -5.93338 |
| NM_021460.1    | Lip1         |                                                                                                                     | induction  | 1.308373 |
| NM_008502.1    | Llgl1        | Mus musculus lethal giant larvae homolog 1 (Drosophila) (Llgl1), mRNA.                                              | repression | -1.33024 |
| XM_001476109.1 | LOC100041290 | PREDICTED: Mus musculus                                                                                             | induction  | 7.377861 |



|                |              |                                                                                                                                                                            |            |          |
|----------------|--------------|----------------------------------------------------------------------------------------------------------------------------------------------------------------------------|------------|----------|
|                |              | hypothetical protein LOC100041290 (LOC100041290), mRNA.                                                                                                                    |            |          |
| XR_034194.1    | LOC100044087 | PREDICTED: Mus musculus similar to brain protein 44 (LOC100044087), misc RNA.                                                                                              | induction  | 1.297544 |
| XR_030993.1    | LOC100044779 | PREDICTED: Mus musculus similar to prothymosin alpha (LOC100044779), misc RNA.                                                                                             | induction  | 1.301446 |
| XR_031252.1    | LOC100045002 | PREDICTED: Mus musculus similar to ataxin-7 (LOC100045002), misc RNA.                                                                                                      | induction  | 4.61645  |
| XR_031850.1    | LOC100045628 | PREDICTED: Mus musculus similar to X-linked PEST-containing transporter (LOC100045628), misc RNA.                                                                          | induction  | 1.401805 |
| XM_001476585.1 | LOC100046355 | PREDICTED: Mus musculus similar to Collagen-like tail subunit (single strand of homotrimer) of asymmetric acetylcholinesterase, transcript variant 1 (LOC100046355), mRNA. | repression | -5.241   |
| XM_001476879.1 | LOC100046841 | PREDICTED: Mus musculus similar to RP42 (LOC100046841), mRNA.                                                                                                              | induction  | 1.333546 |
| XM_001479337.1 | LOC100047810 | PREDICTED: Mus musculus similar to transmembrane emp24 protein transport domain containing 6 (LOC100047810), mRNA.                                                         | induction  | 2.180545 |
| XM_001471973.1 | LOC100048816 | PREDICTED: Mus musculus similar to Brain-specific angiogenesis inhibitor 2 (LOC100048816), mRNA.                                                                           | repression | -3.88859 |
| XM_001472990.1 | LOC100048858 | PREDICTED: Mus musculus similar to Ribosomal protein S6 kinase, polypeptide 2 (LOC100048858), mRNA.                                                                        | repression | -1.33061 |
| XM_354986.1    | LOC381066    |                                                                                                                                                                            | induction  | 1.567931 |
| NM_001034887.1 | LOC433416    | Mus musculus similar to cis-Golgi matrix protein GM130 (LOC433416), mRNA.                                                                                                  | induction  | 5.40726  |
| NM_001007590.2 | LOC433886    | Mus musculus hypothetical gene supported by AK049058; BC025881 (LOC433886), mRNA.                                                                                          | repression | -2.13954 |
| NM_001025085.1 | LOC545013    | Mus musculus hypothetical protein LOC545013 (LOC545013), mRNA.                                                                                                             | induction  | 3.61226  |
| XR_002451.1    | LOC669251    | PREDICTED: Mus musculus similar to CD2-associated protein (Mesenchym-to-epithelium transition protein with SH3 domains 1) (METS-1) (LOC669251), mRNA.                      | induction  | 5.860096 |
| NM_172266.2    | Lpgat1       | Mus musculus lysophosphatidylglycerol acyltransferase 1 (Lpgat1), mRNA.                                                                                                    | induction  | 1.468197 |
| NM_177725.2    | Lrrc8        |                                                                                                                                                                            | repression | -1.4239  |
| NM_178701.2    | Lrrc8d       | Mus musculus leucine rich repeat containing 8D (Lrrc8d), mRNA.                                                                                                             | repression | -1.26638 |
| NM_026668.2    | Lrriq4       | Mus musculus leucine-rich repeats and IQ motif containing 4 (Lrriq4), mRNA.                                                                                                | repression | -2.04179 |
| NM_133939.1    | Lsm8         | Mus musculus LSM8 homolog, U6 small nuclear RNA associated (S. cerevisiae) (Lsm8), mRNA.                                                                                   | repression | -1.21362 |
| NM_017405.1    | Lsr          | Mus musculus lipolysis stimulated lipoprotein receptor (Lsr), mRNA.                                                                                                        | induction  | 3.310709 |
| NM_010738.2    | Ly6a         | Mus musculus lymphocyte antigen 6 complex, locus A (Ly6a), mRNA.                                                                                                           | repression | -1.16869 |
| NM_033478.2    | Ly6g6d       | Mus musculus lymphocyte antigen 6 complex, locus G6D (Ly6g6d), mRNA.                                                                                                       | induction  | 3.752964 |
| NM_177139.3    | Lypd6        | Mus musculus LY6/PLAUR domain containing 6 (Lypd6), mRNA.                                                                                                                  | induction  | 6.869585 |
| NM_008866.2    | Lypla1       | Mus musculus lysophospholipase 1                                                                                                                                           | induction  | 1.450383 |

|                |          |                                                                                                                                              |            |          |
|----------------|----------|----------------------------------------------------------------------------------------------------------------------------------------------|------------|----------|
|                |          | (Lypla1), mRNA.                                                                                                                              |            |          |
| NM_145527.3    | Madd     | Mus musculus MAP-kinase activating death domain (Madd), mRNA.                                                                                | repression | -2.45134 |
| NM_020016.1    | Magea2   | Mus musculus melanoma antigen, family A, 2 (Magea2), mRNA.                                                                                   | induction  | 1.838267 |
| NM_001029850.2 | Magi1    | Mus musculus membrane associated guanylate kinase, WW and PDZ domain containing 1 (Magi1), transcript variant 3, mRNA.                       | repression | -1.79167 |
| NM_010764.2    | Man2b1   | Mus musculus mannosidase 2, alpha B1 (Man2b1), mRNA.                                                                                         | repression | -1.11044 |
| NM_025735.1    | Map1lc3a | Mus musculus microtubule-associated protein 1 light chain 3 alpha (Map1lc3a), mRNA.                                                          | induction  | 1.340877 |
| NM_153058.3    | Mapre2   | Mus musculus microtubule-associated protein, RP/EB family, member 2 (Mapre2), mRNA.                                                          | induction  | 1.119263 |
| NM_172279.1    | Mark4    | Mus musculus MAP/microtubule affinity-regulating kinase 4 (Mark4), mRNA.                                                                     | induction  | 2.092209 |
| NM_008641.2    | Mast2    | Mus musculus microtubule associated serine/threonine kinase 2 (Mast2), transcript variant 2, mRNA.                                           | repression | -1.28751 |
| NM_016766.2    | Mcrs1    | Mus musculus microspherule protein 1 (Mcrs1), mRNA.                                                                                          | induction  | 1.326371 |
| NM_020000.2    | Med8     | Mus musculus mediator of RNA polymerase II transcription, subunit 8 homolog (yeast) (Med8), transcript variant 1, mRNA.                      | induction  | 1.212121 |
| NM_008590.1    | Mest     | Mus musculus mesoderm specific transcript (Mest), mRNA.                                                                                      | induction  | 3.469375 |
| NM_008590.1    | Mest     | Mus musculus mesoderm specific transcript (Mest), mRNA.                                                                                      | induction  | 1.614595 |
| NM_015776.2    | Mfap5    | Mus musculus microfibrillar associated protein 5 (Mfap5), mRNA.                                                                              | induction  | 1.244027 |
| NM_145128.3    | Mgat5    | Mus musculus mannoside acetylglucosaminyltransferase 5 (Mgat5), mRNA.                                                                        | repression | -5.14067 |
| NM_207229      | MGC41689 |                                                                                                                                              | induction  | 1.24649  |
| NM_019946.3    | Mgst1    | Mus musculus microsomal glutathione S-transferase 1 (Mgst1), mRNA.                                                                           | repression | -1.49309 |
| NM_010797.1    | Mid1     |                                                                                                                                              | induction  | 9.581934 |
| NM_010804.3    | Milt10   | Mus musculus myeloid/lymphoid or mixed-lineage leukemia (trithorax homolog, Drosophila); translocated to, 10 (Milt10), mRNA.                 | induction  | 4.004354 |
| NM_053015.2    | Mlph     | Mus musculus melanophilin (Mlph), mRNA.                                                                                                      | repression | -3.51243 |
| NM_029956.3    | Mmab     | Mus musculus methylmalonic aciduria (cobalamin deficiency) type B homolog (human) (Mmab), nuclear gene encoding mitochondrial protein, mRNA. | repression | -1.2747  |
| NM_019471.2    | Mmp10    | Mus musculus matrix metalloproteinase 10 (Mmp10), mRNA.                                                                                      | induction  | 2.8356   |
| NM_013826.2    | Mocs2    | Mus musculus molybdenum cofactor synthesis 2 (Mocs2), mRNA.                                                                                  | induction  | 1.277862 |
| NM_153101      | Mrgpra2  |                                                                                                                                              | induction  | 1.641654 |
| NM_153101.1    | Mrgpra2  | Mus musculus MAS-related GPR, member A2 (Mrgpra2), mRNA.                                                                                     | induction  | 1.732994 |
| NM_026246.3    | Mrpl49   | Mus musculus mitochondrial ribosomal protein L49 (Mrpl49), nuclear gene encoding mitochondrial protein, mRNA.                                | repression | -1.58303 |
| NM_025595.3    | Mrpl51   | Mus musculus mitochondrial ribosomal protein L51 (Mrpl51),                                                                                   | repression | -1.15465 |

|                |        |                                                                                                                 |            |          |
|----------------|--------|-----------------------------------------------------------------------------------------------------------------|------------|----------|
|                |        | nuclear gene encoding mitochondrial protein, mRNA.                                                              |            |          |
| NM_020560.1    | Mrps31 | Mus musculus mitochondrial ribosomal protein S31 (Mrps31), nuclear gene encoding mitochondrial protein, mRNA.   | repression | -1.12143 |
| NM_026422.1    | Mrrf   | Mus musculus mitochondrial ribosome recycling factor (Mrrf), nuclear gene encoding mitochondrial protein, mRNA. | repression | -1.21856 |
| NM_001013389.1 | Mrs2   | Mus musculus MRS2 magnesium homeostasis factor homolog (S. cerevisiae) (Mrs2), mRNA.                            | repression | -1.74015 |
| NM_020597.2    | Msemb  | Mus musculus beta-microseminoprotein (Msemb), mRNA.                                                             | induction  | 3.047036 |
| NM_030707.1    | Msr2   | Mus musculus macrophage scavenger receptor 2 (Msr2), mRNA.                                                      | induction  | 1.326339 |
| NM_001039373.3 | Mtcp1  | Mus musculus mature T-cell proliferation 1 (Mtcp1), transcript variant 1, mRNA.                                 | induction  | 1.924541 |
| NM_027134.1    | Mtfmt  | Mus musculus mitochondrial methionyl-tRNA formyltransferase (Mtfmt), mRNA.                                      | repression | -2.21659 |
| NM_026829.1    | Mthfs  | Mus musculus 5, 10-methenyltetrahydrofolate synthetase (Mthfs), mRNA.                                           | induction  | 1.514364 |
| NM_172761.1    | Mthfsd | Mus musculus methenyltetrahydrofolate synthetase domain containing (Mthfsd), mRNA.                              | induction  | 4.986826 |
| NM_026849.1    | Mtmr14 | Mus musculus myotubularin related protein 14 (Mtmr14), mRNA.                                                    | repression | -1.66752 |
| NM_028860.1    | Mtmr3  | Mus musculus myotubularin related protein 3 (Mtmr3), mRNA.                                                      | induction  | 1.163166 |
| NM_023431.5    | Mum1   | Mus musculus melanoma associated antigen (mutated) 1 (Mum1), mRNA.                                              | repression | -1.19036 |
| NM_008649.2    | Mup5   | Mus musculus major urinary protein 5 (Mup5), mRNA.                                                              | repression | -3.14366 |
| NM_181390.1    | Mustn1 | Mus musculus musculoskeletal, embryonic nuclear protein 1 (Mustn1), mRNA.                                       | repression | -1.13369 |
| NM_133250.1    | Mutyh  | Mus musculus mutY homolog (E. coli) (Mutyh), nuclear gene encoding mitochondrial protein, mRNA.                 | induction  | 3.60427  |
| NM_013606      | Mx2    |                                                                                                                 | induction  | 1.522008 |
| NM_008653.2    | Mybpc3 | Mus musculus myosin binding protein C, cardiac (Mybpc3), mRNA.                                                  | repression | -1.11778 |
| NM_207215.2    | Mycbp2 | Mus musculus MYC binding protein 2 (Mycbp2), mRNA.                                                              | induction  | 1.713149 |
| NM_010851.2    | Myd88  | Mus musculus myeloid differentiation primary response gene 88 (Myd88), mRNA.                                    | repression | -1.27155 |
| NM_023402.1    | Mylc2b | Mus musculus myosin light chain, regulatory B (Mylc2b), mRNA.                                                   | induction  | 1.194133 |
| NM_139300.3    | Mylk   | Mus musculus myosin, light polypeptide kinase (Mylk), mRNA.                                                     | repression | -1.19022 |
| NM_001033621.3 | Myot   | Mus musculus myotilin (Myot), mRNA.                                                                             | induction  | 4.8083   |
| NM_017479      | Myst4  |                                                                                                                 | repression | -3.36741 |
| NM_053089.2    | Narg1  | Mus musculus NMDA receptor-regulated gene 1 (Narg1), mRNA.                                                      | induction  | 3.242854 |
| NM_019825.2    | Ncoa6  | Mus musculus nuclear receptor coactivator 6 (Ncoa6), mRNA.                                                      | induction  | 1.294344 |
| NM_029755.1    | Ndp52  | Mus musculus nuclear domain 10 protein 52 (Ndp52), mRNA.<br>XM_989530 XM_989588<br>XM_992279 XM_992355          | induction  | 4.721273 |
| NM_145602.2    | Ndr4   | Mus musculus N-myc downstream regulated gene 4 (Ndr4), mRNA.                                                    | induction  | 1.421146 |

|                |        |                                                                                                                                                                                                                                                                                                                                                                                   |            |          |
|----------------|--------|-----------------------------------------------------------------------------------------------------------------------------------------------------------------------------------------------------------------------------------------------------------------------------------------------------------------------------------------------------------------------------------|------------|----------|
| NM_010886.1    | Ndufa4 | Mus musculus NADH dehydrogenase (ubiquinone) 1 alpha subcomplex, 4 (Ndufa4), mRNA.                                                                                                                                                                                                                                                                                                | repression | -1.12969 |
| NM_010908.3    | Nfkbib |                                                                                                                                                                                                                                                                                                                                                                                   | induction  | 1.493231 |
| NM_020045.2    | Nfu1   | Mus musculus NFU1 iron-sulfur cluster scaffold homolog (S. cerevisiae) (Nfu1), mRNA.                                                                                                                                                                                                                                                                                              | induction  | 1.297873 |
| NM_010913.1    | Nfya   | Mus musculus nuclear transcription factor-Y alpha (Nfya), mRNA.                                                                                                                                                                                                                                                                                                                   | repression | -3.68678 |
| NM_021504.2    | Ngly1  | Mus musculus N-glycanase 1 (Ngly1), mRNA.                                                                                                                                                                                                                                                                                                                                         | repression | -4.95957 |
| NM_022656.2    | Nisch  | Mus musculus nischarin (Nisch), mRNA.                                                                                                                                                                                                                                                                                                                                             | repression | -1.20083 |
| NM_001025286.1 | Nkain2 | Mus musculus Na+/K+ transporting ATPase interacting 2 (Nkain2), transcript variant 2, mRNA.                                                                                                                                                                                                                                                                                       | induction  | 5.762983 |
| NM_001004194.1 | Nlrp4e | Mus musculus NLR family, pyrin domain containing 4E (Nlrp4e), mRNA.                                                                                                                                                                                                                                                                                                               | induction  | 5.050894 |
| NM_019731.1    | Nme4   | Mus musculus non-metastatic cells 4, protein expressed in (Nme4), nuclear gene encoding mitochondrial protein, mRNA.                                                                                                                                                                                                                                                              | repression | -2.42728 |
| NM_153057.3    | Nomo1  | Mus musculus nodal modulator 1 (Nomo1), mRNA.                                                                                                                                                                                                                                                                                                                                     | repression | -1.26785 |
| NM_025533.2    | Nosip  | Mus musculus nitric oxide synthase interacting protein (Nosip), mRNA.                                                                                                                                                                                                                                                                                                             | repression | -1.20138 |
| NM_152229.2    | Nr2e1  | Mus musculus nuclear receptor subfamily 2, group E, member 1 (Nr2e1), mRNA.                                                                                                                                                                                                                                                                                                       | induction  | 4.226141 |
| NM_178591.2    | Nrg1   | Mus musculus neuregulin 1 (Nrg1), mRNA. XM_900811 XM_900817 XM_900821 XM_900824 XM_900832 XM_900835 XM_912993 XM_922562 XM_922570 XM_922577 XM_922594 XM_922603 XM_922607 XM_922617 XM_922623 XM_922629 XM_922636 XM_986275 XM_986302 XM_986330 XM_986362 XM_986394 XM_986425 XM_986458 XM_986492 XM_986565 XM_986605 XM_986645 XM_986682 XM_986725 XM_988214 XM_990248 XM_990278 | repression | -4.08797 |
| NM_032002.1    | Nrg4   | Mus musculus neuregulin 4 (Nrg4), mRNA.                                                                                                                                                                                                                                                                                                                                           | repression | -2.27809 |
| NM_173440.2    | Nrip1  | Mus musculus nuclear receptor interacting protein 1 (Nrip1), mRNA.                                                                                                                                                                                                                                                                                                                | repression | -2.68155 |
| NM_010941.3    | Nsdhl  | Mus musculus NAD(P) dependent steroid dehydrogenase-like (Nsdhl), mRNA.                                                                                                                                                                                                                                                                                                           | repression | -1.55279 |
| NM_198654.2    | Nsl1   | Mus musculus NSL1, MIND kinetochore complex component, homolog (S. cerevisiae) (Nsl1), mRNA.                                                                                                                                                                                                                                                                                      | induction  | 5.785458 |
| NM_027588.2    | Nt5c1b | Mus musculus 5'-nucleotidase, cytosolic 1B (Nt5c1b), mRNA.                                                                                                                                                                                                                                                                                                                        | repression | -6.39948 |
| NM_153595.2    | Nt5dc3 | Mus musculus 5'-nucleotidase domain containing 3 (Nt5dc3), transcript variant 2, mRNA.                                                                                                                                                                                                                                                                                            | repression | -2.33047 |
| NM_024435.2    | Nts    | Mus musculus neurotensin (Nts), mRNA.                                                                                                                                                                                                                                                                                                                                             | repression | -2.58006 |
| NM_011956.2    | Nubp2  | Mus musculus nucleotide binding protein 2 (Nubp2), mRNA.                                                                                                                                                                                                                                                                                                                          | induction  | 1.155346 |
| NM_024446.3    | Nudt7  | Mus musculus nudix (nucleoside                                                                                                                                                                                                                                                                                                                                                    | repression | -5.63549 |

|                |                    |                                                                                        |            |          |
|----------------|--------------------|----------------------------------------------------------------------------------------|------------|----------|
|                |                    | diphosphate linked moiety X)-type motif 7 (Nudt7), transcript variant 2, mRNA.         |            |          |
| NM_010950.2    | Numbl              | Mus musculus numb-like (Numbl), mRNA.                                                  | induction  | 1.692622 |
| NM_173777.3    | Olfm2              | Mus musculus olfactomedin 2 (Olfm2), mRNA.                                             | repression | -4.82596 |
| NM_177068.3    | Olfml2b            | Mus musculus olfactomedin-like 2B (Olfml2b), mRNA.                                     | induction  | 1.362032 |
| NM_001011825.1 | Olf1105            | Mus musculus olfactory receptor 1105 (Olf1105), mRNA.                                  | induction  | 2.489103 |
| NM_213721      | Olf118             |                                                                                        | repression | -2.20714 |
| NM_146778.1    | Olf1208            | Mus musculus olfactory receptor 1208 (Olf1208), mRNA.                                  | induction  | 5.861208 |
| NM_146474.1    | Olf1261            | Mus musculus olfactory receptor 1261 (Olf1261), mRNA.                                  | induction  | 5.585977 |
| NM_146394.1    | Olf1278            | Mus musculus olfactory receptor 1278 (Olf1278), mRNA.                                  | induction  | 4.754194 |
| NM_001011856.1 | Olf1331            | Mus musculus olfactory receptor 1331 (Olf1331), mRNA.                                  | induction  | 6.001999 |
| NM_207253.1    | Olf1371            | Mus musculus olfactory receptor 1371 (Olf1371), mRNA.                                  | induction  | 1.689558 |
| NM_147066.1    | Olf1389            | Mus musculus olfactory receptor 1389 (Olf1389), mRNA.                                  | induction  | 2.596247 |
| NM_019475.3    | Olf157             | Mus musculus olfactory receptor 157 (Olf157), mRNA.                                    | induction  | 3.039994 |
| NM_146621.1    | Olf308             | Mus musculus olfactory receptor 308 (Olf308), mRNA.                                    | repression | -3.52821 |
| NM_146426.1    | Olf469             | Mus musculus olfactory receptor 469 (Olf469), mRNA.                                    | induction  | 3.454993 |
| NM_146774.1    | Olf472             | Mus musculus olfactory receptor 472 (Olf472), mRNA.                                    | repression | -5.32266 |
| NM_010998.1    | Olf55              | Mus musculus olfactory receptor 55 (Olf55), mRNA.                                      | induction  | 4.016598 |
| NM_147094.1    | Olf606             | Mus musculus olfactory receptor 606 (Olf606), mRNA.                                    | induction  | 5.100211 |
| NM_146841.1    | Olf617             | Mus musculus olfactory receptor 617 (Olf617), mRNA.                                    | repression | -2.57128 |
| NM_001025386.1 | Olf627             | Mus musculus olfactory receptor 627 (Olf627), mRNA.                                    | induction  | 4.23028  |
| NM_013617.2    | Olf64              | Mus musculus olfactory receptor 64 (Olf64), mRNA.                                      | induction  | 4.709475 |
| NM_207249.1    | Olf684             | Mus musculus olfactory receptor 684 (Olf684), mRNA.                                    | repression | -3.74244 |
| NM_146420.1    | Olf738             | Mus musculus olfactory receptor 738 (Olf738), mRNA.                                    | repression | -4.13338 |
| NM_130866.3    | Olf78              | Mus musculus olfactory receptor 78 (Olf78), mRNA.                                      | repression | -5.29167 |
| NM_001011824.1 | Olf832             | Mus musculus olfactory receptor 832 (Olf832), mRNA.                                    | repression | -3.58183 |
| NM_207560.1    | Olf924             | Mus musculus olfactory receptor 924 (Olf924), mRNA.                                    | repression | -2.00309 |
| NM_013887.1    | Opn4               | Mus musculus opsin 4 (melanopsin) (Opn4), mRNA.                                        | induction  | 1.736078 |
| NM_020622.2    | ORF9               | Mus musculus open reading frame 9 (ORF9), mRNA.                                        | induction  | 3.905983 |
| NM_139310.1    | Otoa               | Mus musculus otoancorin (Otoa), mRNA.                                                  | repression | -11.4529 |
| XM_001474235.1 | OTTMUSG00000004551 | PREDICTED: Mus musculus predicted gene, OTTMUSG00000004551 (OTTMUSG00000004551), mRNA. | induction  | 4.06218  |
| NM_134150.2    | Otub1              | Mus musculus OTU domain, ubiquitin aldehyde binding 1 (Otub1), mRNA.                   | induction  | 1.379317 |
| NM_001001490.2 | Oxgr1              | Mus musculus oxoglutarate (alpha-ketoglutarate) receptor 1 (Oxgr1), mRNA.              | repression | -4.34783 |
| NM_153783.4    | Paox               | Mus musculus polyamine oxidase                                                         | induction  | 6.53265  |

|                |         |                                                                                                                                                                                                                                       |            |          |
|----------------|---------|---------------------------------------------------------------------------------------------------------------------------------------------------------------------------------------------------------------------------------------|------------|----------|
|                |         | (exo-N4-amino) (Paox), mRNA.                                                                                                                                                                                                          |            |          |
| NM_011037.2    | Pax2    | Mus musculus paired box gene 2 (Pax2), mRNA.                                                                                                                                                                                          | induction  | 3.481664 |
| NM_183355.1    | Pbx1    | Mus musculus pre B-cell leukemia transcription factor 1 (Pbx1), transcript variant a, mRNA.                                                                                                                                           | induction  | 3.942474 |
| NM_025835.1    | Pccb    | Mus musculus propionyl Coenzyme A carboxylase, beta polypeptide (Pccb), mRNA.                                                                                                                                                         | repression | -1.18916 |
| NM_130448.2    | Pcdh18  | Mus musculus protocadherin 18 (Pcdh18), mRNA.                                                                                                                                                                                         | induction  | 2.966802 |
| NM_053126.1    | Pcdhb1  | Mus musculus protocadherin beta 1 (Pcdhb1), mRNA.                                                                                                                                                                                     | induction  | 3.469394 |
| NM_008788.2    | Pcolce  | Mus musculus procollagen C-endopeptidase enhancer protein (Pcolce), mRNA.                                                                                                                                                             | induction  | 1.253949 |
| NM_008793.1    | Pcsk4   | Mus musculus proprotein convertase subtilisin/kexin type 4 (Pcsk4), mRNA.                                                                                                                                                             | repression | -2.6859  |
| NM_011050.2    | Pdcd4   | Mus musculus programmed cell death 4 (Pdcd4), mRNA.                                                                                                                                                                                   | induction  | 2.124023 |
| NM_019746.4    | Pdcd5   | Mus musculus programmed cell death 5 (Pdcd5), mRNA.                                                                                                                                                                                   | induction  | 1.307606 |
| NM_028295.1    | Pdia5   | Mus musculus protein disulfide isomerase associated 5 (Pdia5), mRNA.                                                                                                                                                                  | induction  | 1.569318 |
| NM_028295.1    | Pdia5   | Mus musculus protein disulfide isomerase associated 5 (Pdia5), mRNA.                                                                                                                                                                  | induction  | 4.168217 |
| NM_016861.3    | Pdlim1  | Mus musculus PDZ and LIM domain 1 (elfin) (Pdlim1), mRNA.                                                                                                                                                                             | repression | -1.13834 |
| NM_033602      | Peli2   |                                                                                                                                                                                                                                       | repression | -1.55435 |
| NM_134058.1    | Pelo    | Mus musculus pelota homolog (Drosophila) (Pelo), mRNA.                                                                                                                                                                                | repression | -1.16813 |
| NM_026027.3    | Pfdn1   | Mus musculus prefoldin 1 (Pfdn1), mRNA.                                                                                                                                                                                               | induction  | 1.719422 |
| NM_007531.2    | Phb2    | Mus musculus prohibitin 2 (Phb2), mRNA.                                                                                                                                                                                               | repression | -1.17324 |
| NM_172783.2    | Phka2   | Mus musculus phosphorylase kinase alpha 2 (Phka2), mRNA.                                                                                                                                                                              | induction  | 1.27324  |
| NM_013750.1    | Phlda3  | Mus musculus pleckstrin homology-like domain, family A, member 3 (Phlda3), mRNA.                                                                                                                                                      | induction  | 1.727503 |
| NM_028744.1    | Pi4k2b  | Mus musculus phosphatidylinositol 4-kinase type 2 beta (Pi4k2b), transcript variant 2, mRNA.                                                                                                                                          | repression | -5.23865 |
| NM_001077495.1 | Pik3r1  | Mus musculus phosphatidylinositol 3-kinase, regulatory subunit, polypeptide 1 (p85 alpha) (Pik3r1), transcript variant 2, mRNA.                                                                                                       | repression | -1.30715 |
| NM_008841.1    | Pik3r2  | Mus musculus phosphatidylinositol 3-kinase, regulatory subunit, polypeptide 2 (p85 beta) (Pik3r2), mRNA.                                                                                                                              | induction  | 1.445713 |
| NM_008841.1    | Pik3r2  | Mus musculus phosphatidylinositol 3-kinase, regulatory subunit, polypeptide 2 (p85 beta) (Pik3r2), mRNA.                                                                                                                              | repression | -1.54769 |
| NM_027153.2    | Pir     | Mus musculus pirin (Pir), mRNA.                                                                                                                                                                                                       | induction  | 1.756652 |
| NM_145378.2    | Pla2g4b | Mus musculus phospholipase A2, group IVB (cytosolic) (Pla2g4b), mRNA. XM_900391 XM_900400 XM_900408 XM_900416 XM_900430 XM_917664 XM_925074 XM_925078 XM_925084 XM_925088 XM_925090 XM_925092 XM_925095 XM_983757 XM_983791 XM_983829 | induction  | 2.14483  |

|             |          |                                                                                                                            |            |          |
|-------------|----------|----------------------------------------------------------------------------------------------------------------------------|------------|----------|
|             |          | XM_983873 XM_983913<br>XM_984017                                                                                           |            |          |
| NM_172695.2 | Plaa     | Mus musculus phospholipase A2, activating protein (Plaa), mRNA.                                                            | induction  | 1.26772  |
| NM_019588.2 | Plce1    | Mus musculus phospholipase C, epsilon 1 (Plce1), mRNA.                                                                     | repression | -2.11906 |
| NM_201393.1 | Plec1    | Mus musculus plectin 1 (Plec1), transcript variant 10, mRNA.                                                               | repression | -1.36703 |
| NM_133942.2 | Plekha1  | Mus musculus pleckstrin homology domain containing, family A (phosphoinositide binding specific) member 1 (Plekha1), mRNA. | induction  | 1.239092 |
| NM_182930.1 | Plekha6  | Mus musculus pleckstrin homology domain containing, family A member 6 (Plekha6), mRNA.                                     | repression | -1.30954 |
| NM_008877.2 | Plg      | Mus musculus plasminogen (Plg), mRNA.                                                                                      | induction  | 3.086694 |
| NM_013872.2 | Pmm1     | Mus musculus phosphomannomutase 1 (Pmm1), mRNA.                                                                            | repression | -1.55541 |
| NM_010932.1 | Pnoc     | Mus musculus prepronociceptin (Pnoc), mRNA.                                                                                | induction  | 6.432183 |
| NM_013632.3 | Pnp1     | Mus musculus purine-nucleoside phosphorylase 1 (Pnp1), mRNA.                                                               | induction  | 3.970787 |
| NM_025802.2 | Pnpla2   | Mus musculus patatin-like phospholipase domain containing 2 (Pnpla2), mRNA.                                                | repression | -1.27651 |
| NM_172683.1 | Pogz     | Mus musculus pogo transposable element with ZNF domain (Pogz), mRNA.                                                       | repression | -8.40062 |
| NM_009089.2 | Polr2a   | Mus musculus polymerase (RNA) II (DNA directed) polypeptide A (Polr2a), mRNA.                                              | repression | -4.3989  |
| NM_027231.1 | Polr2f   | Mus musculus polymerase (RNA) II (DNA directed) polypeptide F (Polr2f), mRNA.                                              | repression | -1.21855 |
| NM_025298.2 | Polr3e   | Mus musculus polymerase (RNA) III (DNA directed) polypeptide E (Polr3e), mRNA.                                             | repression | -5.36809 |
| NM_172551.2 | Polrmt   | Mus musculus polymerase (RNA) mitochondrial (DNA directed) (Polrmt), nuclear gene encoding mitochondrial protein, mRNA.    | repression | -1.19387 |
| NM_027351.2 | Ppil3    | Mus musculus peptidylprolyl isomerase (cyclophilin)-like 3 (Ppil3), transcript variant 1, mRNA.                            | induction  | 2.966608 |
| NM_175523.4 | Ppm1k    | Mus musculus protein phosphatase 1K (PP2C domain containing) (Ppm1k), mRNA.                                                | repression | -1.50295 |
| NM_133485.2 | Ppp1r14c | Mus musculus protein phosphatase 1, regulatory (inhibitor) subunit 14c (Ppp1r14c), mRNA.                                   | induction  | 1.344014 |
| NM_181595.3 | Ppp1r9a  | Mus musculus protein phosphatase 1, regulatory (inhibitor) subunit 9A (Ppp1r9a), mRNA.                                     | repression | -1.22527 |
| NM_172261.2 | Ppp1r9b  | Mus musculus protein phosphatase 1, regulatory subunit 9B (Ppp1r9b), mRNA.                                                 | repression | -1.24016 |
| NM_008913.3 | Ppp3ca   | Mus musculus protein phosphatase 3, catalytic subunit, alpha isoform (Ppp3ca), mRNA.                                       | induction  | 1.599226 |
| NM_019441.2 | Ppt2     | Mus musculus palmitoyl-protein thioesterase 2 (Ppt2), mRNA.                                                                | induction  | 1.616638 |
| NM_145150.1 | Prc1     | Mus musculus protein regulator of cytokinesis 1 (Prc1), mRNA.                                                              | induction  | 1.709664 |
| NM_133364.2 | Prima1   | Mus musculus proline rich membrane anchor 1 (Prima1), mRNA.                                                                | repression | -5.00373 |
| NM_008854.3 | Prkaca   | Mus musculus protein kinase, cAMP                                                                                          | induction  | 1.161362 |

|                |         |                                                                                           |            |          |
|----------------|---------|-------------------------------------------------------------------------------------------|------------|----------|
|                |         | dependent, catalytic, alpha (Prkaca), mRNA.                                               |            |          |
| NM_016781.2    | Prkag1  | Mus musculus protein kinase, AMP-activated, gamma 1 non-catalytic subunit (Prkag1), mRNA. | repression | -1.18357 |
| NM_008858.1    | Prkcm   | Mus musculus protein kinase C, mu (Prkcm), mRNA.                                          | repression | -6.68002 |
| NM_011159.1    | Prkdc   |                                                                                           | repression | -1.98007 |
| NM_019546.4    | Prodh2  | Mus musculus proline dehydrogenase (oxidase) 2 (Prodh2), mRNA.                            | induction  | 2.832116 |
| NM_021381.3    | Prokr1  | Mus musculus prokineticin receptor 1 (Prokr1), mRNA.                                      | repression | -1.94059 |
| NM_011173.2    | Pros1   | Mus musculus protein S (alpha) (Pros1), mRNA.                                             | repression | -1.26401 |
| NM_026045.3    | Prpf18  | Mus musculus PRP18 pre-mRNA processing factor 18 homolog (yeast) (Prpf18), mRNA.          | repression | -1.13478 |
| NM_053260.2    | Prss29  | Mus musculus protease, serine, 29 (Prss29), mRNA.                                         | induction  | 2.576313 |
| NM_173347.2    | Prune   | Mus musculus prune homolog (Drosophila) (Prune), mRNA.                                    | repression | -1.70724 |
| NM_025498.2    | Psenen  | Mus musculus presenilin enhancer 2 homolog (C. elegans) (Psenen), mRNA.                   | repression | -1.33549 |
| NM_001004152.1 | Psg22   | Mus musculus pregnancy-specific glycoprotein 22 (Psg22), mRNA.                            | repression | -2.89468 |
| NM_011193.1    | Pstpip1 | Mus musculus proline-serine-threonine phosphatase-interacting protein 1 (Pstpip1), mRNA.  | repression | -4.74113 |
| NM_019455.2    | Ptgds2  | Mus musculus prostaglandin D2 synthase 2, hematopoietic (Ptgds2), mRNA.                   | repression | -4.03823 |
| NM_207232.1    | Ptpdc1  | Mus musculus protein tyrosine phosphatase domain containing 1 (Ptpdc1), mRNA.             | induction  | 1.357729 |
| NM_013643.1    | Ptpn5   | Mus musculus protein tyrosine phosphatase, non-receptor type 5 (Ptpn5), mRNA.             | induction  | 2.646311 |
| NM_011218.1    | Ptprs   | Mus musculus protein tyrosine phosphatase, receptor type, S (Ptprs), mRNA.                | induction  | 2.613735 |
| NM_011218.1    | Ptprs   | Mus musculus protein tyrosine phosphatase, receptor type, S (Ptprs), mRNA.                | induction  | 10.54269 |
| NM_008990.2    | Pvrl2   | Mus musculus poliovirus receptor-related 2 (Pvrl2), mRNA.                                 | repression | -1.22037 |
| NM_008993.2    | Pxmp2   | Mus musculus peroxisomal membrane protein 2 (Pxmp2), mRNA.                                | repression | -1.34411 |
| NM_001081054.2 | Qrs1    | Mus musculus glutamyl-tRNA synthase (glutamine-hydrolyzing)-like 1 (Qrs1), mRNA.          | repression | -1.20961 |
| NM_026677.1    | Rab13   | Mus musculus RAB13, member RAS oncogene family (Rab13), mRNA.                             | repression | -3.4841  |
| NM_008998.2    | Rab17   | Mus musculus RAB17, member RAS oncogene family (Rab17), mRNA.                             | induction  | 4.575945 |
| NM_029576.1    | Rab1b   | Mus musculus RAB1B, member RAS oncogene family (Rab1b), mRNA.                             | induction  | 2.336549 |
| NM_016899.2    | Rab25   | Mus musculus RAB25, member RAS oncogene family (Rab25), mRNA.                             | repression | -6.62142 |
| NM_021411.2    | Rab37   | Mus musculus RAB37, member of RAS oncogene family (Rab37), mRNA.                          | induction  | 4.359967 |
| NM_009001.3    | Rab3a   | Mus musculus RAB3A, member RAS oncogene family (Rab3a), mRNA.                             | repression | -1.12748 |
| NM_031874.4    | Rab3d   | Mus musculus RAB3D, member RAS oncogene family (Rab3d), mRNA.                             | induction  | 1.275121 |



|                |          |                                                                                                                               |            |          |
|----------------|----------|-------------------------------------------------------------------------------------------------------------------------------|------------|----------|
| NM_133717.2    | Rab43    | Mus musculus RAB43, member RAS oncogene family (Rab43), transcript variant 2, mRNA.                                           | induction  | 2.124535 |
| NM_010261.2    | Rabac1   | Mus musculus Rab acceptor 1 (prenylated) (Rabac1), mRNA.                                                                      | repression | -1.2105  |
| NM_145522.3    | Rabepk   | Mus musculus Rab9 effector protein with kelch motifs (Rabepk), mRNA.                                                          | repression | -5.47249 |
| NM_013862.3    | Rabgap1l | Mus musculus RAB GTPase activating protein 1-like (Rabgap1l), transcript variant 1, mRNA.<br>XM_924767 XM_924771<br>XM_924774 | induction  | 1.280653 |
| NM_011233.2    | Rad17    | Mus musculus RAD17 homolog (S. pombe) (Rad17), transcript variant 1, mRNA.                                                    | induction  | 2.346813 |
| NM_009012.2    | Rad50    | Mus musculus RAD50 homolog (S. cerevisiae) (Rad50), mRNA.                                                                     | induction  | 3.317802 |
| NM_011235.3    | Rad51l3  | Mus musculus RAD51-like 3 (S. cerevisiae) (Rad51l3), mRNA.                                                                    | induction  | 1.532894 |
| NM_020030.2    | Raet1d   | Mus musculus retinoic acid early transcript delta (Raet1d), mRNA.                                                             | induction  | 3.816159 |
| NM_001080925.1 | Rapgef1l | Mus musculus Rap guanine nucleotide exchange factor (GEF)-like 1 (Rapgef1l), mRNA.                                            | induction  | 1.435919 |
| NM_175023.2    | Rbbp6    | Mus musculus retinoblastoma binding protein 6 (Rbbp6), transcript variant 2, mRNA.                                            | induction  | 4.96256  |
| NM_001039080.1 | Rbms2    | Mus musculus RNA binding motif, single stranded interacting protein 2 (Rbms2), transcript variant 2, mRNA.                    | induction  | 1.566471 |
| NM_022980.4    | Rcan3    | Mus musculus regulator of calcineurin 3 (Rcan3), mRNA.                                                                        | induction  | 1.229083 |
| NM_144865.1    | Reep2    | Mus musculus receptor accessory protein 2 (Reep2), mRNA.                                                                      | induction  | 4.543609 |
| NM_177073.5    | Relt     | Mus musculus RELT tumor necrosis factor receptor (Relt), mRNA.                                                                | induction  | 1.6448   |
| NM_031192.2    | Ren1     | Mus musculus renin 1 structural (Ren1), mRNA.                                                                                 | induction  | 2.340748 |
| NM_015811.1    | Rgs1     | Mus musculus regulator of G-protein signaling 1 (Rgs1), mRNA.                                                                 | repression | -6.11211 |
| NM_008164.1    | Rhpn1    | Mus musculus rhophilin, Rho GTPase binding protein 1 (Rhpn1), mRNA.                                                           | induction  | 2.933763 |
| NM_001038624.1 | Ric3     | Mus musculus resistance to inhibitors of cholinesterase 3 homolog (C. elegans) (Ric3), transcript variant 1, mRNA.            | induction  | 1.562626 |
| NM_138952.3    | Ripk2    | Mus musculus receptor (TNFRSF)-interacting serine-threonine kinase 2 (Ripk2), mRNA.                                           | induction  | 1.383961 |
| NM_011275.1    | Rnaseh1  | Mus musculus ribonuclease H1 (Rnaseh1), mRNA.                                                                                 | repression | -1.46134 |
| NM_175136.2    | Rnf122   | Mus musculus ring finger protein 122 (Rnf122), mRNA.                                                                          | repression | -2.17882 |
| NM_176834.2    | Rnf208   | Mus musculus ring finger protein 208 (Rnf208), mRNA.                                                                          | induction  | 1.788618 |
| NM_001038993.2 | Rnf38    | Mus musculus ring finger protein 38 (Rnf38), transcript variant 2, mRNA.                                                      | induction  | 5.578114 |
| NM_133242.1    | Rnpc2    |                                                                                                                               | induction  | 2.87517  |
| NM_133185.2    | Rogdi    | Mus musculus roghi homolog (Drosophila) (Rogdi), mRNA.                                                                        | induction  | 1.354218 |
| NM_027434.2    | Rprd1b   | Mus musculus regulation of nuclear pre-mRNA domain containing 1B (Rprd1b), mRNA.                                              | repression | -1.16139 |
| NM_001081293.1 | Rprd2    | Mus musculus Regulation of nuclear pre-mRNA domain containing 2 (Rprd2), mRNA.                                                | repression | -1.46449 |
| NM_009104.1    | Rrm2     | Mus musculus ribonucleotide                                                                                                   | induction  | 1.5489   |

|                |           |                                                                                                                                           |            |          |
|----------------|-----------|-------------------------------------------------------------------------------------------------------------------------------------------|------------|----------|
|                |           | reductase M2 (Rrm2), mRNA.                                                                                                                |            |          |
| NM_009106.1    | Rtkn      | Mus musculus rhotekin (Rtkn), transcript variant 1, mRNA.                                                                                 | induction  | 2.628115 |
| NM_001081346.1 | Rtkn2     | Mus musculus rhotekin 2 (Rtkn2), mRNA.                                                                                                    | induction  | 2.252196 |
| NM_184109.1    | Rtl1      | Mus musculus retrotransposon-like 1 (Rtl1), mRNA.                                                                                         | repression | -5.53252 |
| NM_013650.2    | S100a8    | Mus musculus S100 calcium binding protein A8 (calgranulin A) (S100a8), mRNA.                                                              | repression | -2.47961 |
| NM_020568.2    | S3-12     | Mus musculus plasma membrane associated protein, S3-12 (S3-12), mRNA.                                                                     | repression | -1.30961 |
| NM_009117.3    | Saa1      | Mus musculus serum amyloid A 1 (Saa1), mRNA.                                                                                              | induction  | 6.076052 |
| NM_001037221.1 | Samd4     | Mus musculus sterile alpha motif domain containing 4 (Samd4), transcript variant 1, mRNA.                                                 | repression | -5.27306 |
| NM_023380.2    | Samsn1    | Mus musculus SAM domain, SH3 domain and nuclear localization signals, 1 (Samsn1), mRNA.                                                   | induction  | 2.326926 |
| NM_172205.3    | Sbsn      | Mus musculus suprabasin (Sbsn), transcript variant 1, mRNA.                                                                               | repression | -5.34214 |
| NM_011322.2    | Scn1b     | Mus musculus sodium channel, voltage-gated, type I, beta (Scn1b), mRNA.                                                                   | induction  | 4.795047 |
| NM_153522      | Scn3b     |                                                                                                                                           | induction  | 2.325955 |
| NM_198885.2    | Scx       | Mus musculus scleraxis (Scx), mRNA.                                                                                                       | repression | -1.6329  |
| NM_133704.3    | Sec22l2   |                                                                                                                                           | induction  | 3.522292 |
| NM_027016.2    | Sec62     | Mus musculus SEC62 homolog (S. cerevisiae) (Sec62), mRNA.                                                                                 | induction  | 4.757289 |
| NM_009153.2    | Sema3b    | Mus musculus sema domain, immunoglobulin domain (Ig), short basic domain, secreted, (semaphorin) 3B (Sema3b), transcript variant 2, mRNA. | induction  | 6.400633 |
| NM_009154.1    | Sema5a    |                                                                                                                                           | repression | -1.35444 |
| NM_053102.2    | Sep15     | Mus musculus selenoprotein (Sep15), mRNA.                                                                                                 | induction  | 1.940201 |
| NM_019942.2    | Sept6     | Mus musculus septin 6 (Sept6), mRNA.                                                                                                      | repression | -1.39327 |
| NM_001025371.1 | Serinc4   | Mus musculus serine incorporator 4 (Serinc4), mRNA.                                                                                       | induction  | 4.559603 |
| NM_026535.2    | Serpina12 | Mus musculus serine (or cysteine) peptidase inhibitor, clade A (alpha-1 antiproteinase, antitrypsin), member 12 (Serpina12), mRNA.        | induction  | 5.895452 |
| NM_027971.1    | Serpina12 | Mus musculus serine (or cysteine) peptidase inhibitor, clade B (ovalbumin), member 12 (Serpina12), mRNA.                                  | repression | -2.31459 |
| NM_009126.2    | Serpina3a | Mus musculus serine (or cysteine) peptidase inhibitor, clade B (ovalbumin), member 3A (Serpina3a), mRNA.                                  | repression | -2.13521 |
| NM_008878.1    | Serpina2  | Mus musculus serine (or cysteine) peptidase inhibitor, clade F, member 2 (Serpina2), mRNA.                                                | induction  | 3.293375 |
| NM_009825.1    | Serpina1  | Mus musculus serine (or cysteine) peptidase inhibitor, clade H, member 1 (Serpina1), mRNA.                                                | induction  | 1.610819 |
| NM_001035123.1 | Setd6     | Mus musculus SET domain containing 6 (Setd6), mRNA.                                                                                       | repression | -1.25112 |
| NM_134091.1    | Sgsm3     | Mus musculus small G protein signaling modulator 3 (Sgsm3), mRNA.                                                                         | repression | -1.58045 |
| NM_024499.1    | Sgta      | Mus musculus small glutamine-rich                                                                                                         | repression | -1.25644 |

|                |          |                                                                                                                       |            |          |
|----------------|----------|-----------------------------------------------------------------------------------------------------------------------|------------|----------|
|                |          | tetratricopeptide repeat (TPR)-containing, alpha (Sgta), mRNA.                                                        |            |          |
| NM_009164.2    | Sh3bp1   | Mus musculus SH3-domain binding protein 1 (Sh3bp1), mRNA.                                                             | induction  | 7.836345 |
| NM_172788.2    | Sh3md4   | Mus musculus SH3 multiple domains 4 (Sh3md4), mRNA.                                                                   | repression | -6.25816 |
| NM_172966.1    | Sh3rf2   | Mus musculus SH3 domain containing ring finger 2 (Sh3rf2), mRNA.                                                      | repression | -1.21341 |
| NM_001013829.2 | Shf      | Mus musculus Src homology 2 domain containing F (Shf), mRNA.                                                          | induction  | 2.907089 |
| NM_011378.1    | Sin3a    | Mus musculus transcriptional regulator, SIN3A (yeast) (Sin3a), mRNA.                                                  | repression | -1.16263 |
| NM_144836      | Slc17a2  |                                                                                                                       | induction  | 3.715687 |
| NM_182959.2    | Slc17a8  | Mus musculus solute carrier family 17 (sodium-dependent inorganic phosphate cotransporter), member 8 (Slc17a8), mRNA. | induction  | 3.780369 |
| NM_054087.2    | Slc19a2  | Mus musculus solute carrier family 19 (thiamine transporter), member 2 (Slc19a2), mRNA.                               | induction  | 1.207541 |
| NM_146255.1    | Slc1a7   | Mus musculus solute carrier family 1 (glutamate transporter), member 7 (Slc1a7), mRNA.                                | induction  | 1.510438 |
| NM_144856.1    | Slc22a7  | Mus musculus solute carrier family 22 (organic anion transporter), member 7 (Slc22a7), mRNA.                          | induction  | 1.890151 |
| NM_053195.2    | Slc24a3  | Mus musculus solute carrier family 24 (sodium/potassium/calcium exchanger), member 3 (Slc24a3), mRNA.                 | repression | -1.12114 |
| NM_001013780.1 | Slc25a34 | Mus musculus solute carrier family 25, member 34 (Slc25a34), mRNA.                                                    | repression | -1.68184 |
| NM_144793.1    | Slc25a38 | Mus musculus solute carrier family 25, member 38 (Slc25a38), mRNA.                                                    | repression | -1.21795 |
| NM_178766.3    | Slc25a40 | Mus musculus solute carrier family 25, member 40 (Slc25a40), mRNA.                                                    | repression | -6.09659 |
| NM_178696.3    | Slc25a44 | Mus musculus solute carrier family 25, member 44 (Slc25a44), mRNA.                                                    | repression | -1.40916 |
| NM_022317.3    | Slc28a3  | Mus musculus solute carrier family 28 (sodium-coupled nucleoside transporter), member 3 (Slc28a3), mRNA.              | induction  | 6.065248 |
| NM_134060.2    | Slc35b3  | Mus musculus solute carrier family 35, member B3 (Slc35b3), mRNA.                                                     | repression | -1.2483  |
| NM_177766.2    | Slc35e1  | Mus musculus solute carrier family 35, member E1 (Slc35e1), mRNA.                                                     | repression | -1.23779 |
| NM_001009950.1 | Slc38a8  | Mus musculus solute carrier family 38, member 8 (Slc38a8), mRNA.                                                      | repression | -4.13905 |
| NM_134135.1    | Slc39a3  | Mus musculus solute carrier family 39 (zinc transporter), member 3 (Slc39a3), mRNA.                                   | induction  | 6.206082 |
| NM_016917.2    | Slc40a1  | Mus musculus solute carrier family 40 (iron-regulated transporter), member 1 (Slc40a1), mRNA.                         | repression | -1.62669 |
| NM_021530.2    | Slc4a8   | Mus musculus solute carrier family 4 (anion exchanger), member 8 (Slc4a8), mRNA.                                      | repression | -1.39464 |
| NM_178703.2    | Slc6a1   | Mus musculus solute carrier family 6 (neurotransmitter transporter, GABA), member 1 (Slc6a1), mRNA. XM_976103         | induction  | 3.789816 |
| NM_172890.3    | Slc6a11  | Mus musculus solute carrier family 6 (neurotransmitter transporter, GABA), member 11 (Slc6a11), mRNA.                 | induction  | 4.425629 |
| NM_175328.2    | Slc6a15  | Mus musculus solute carrier family 6                                                                                  | repression | -2.81367 |

|             |         |                                                                                                                                 |            |          |
|-------------|---------|---------------------------------------------------------------------------------------------------------------------------------|------------|----------|
|             |         | (neurotransmitter transporter), member 15 (Slc6a15), mRNA.                                                                      |            |          |
| NM_175316.3 | Slco2b1 | Mus musculus solute carrier organic anion transporter family, member 2b1 (Slco2b1), mRNA.                                       | repression | -1.32608 |
| NM_011407.1 | Slfn1   | Mus musculus schlafen 1 (Slfn1), mRNA.                                                                                          | induction  | 5.829448 |
| NM_009289.2 | Slk     | Mus musculus STE20-like kinase (yeast) (Slk), mRNA.                                                                             | repression | -4.29771 |
| NM_198160.1 | Smarcc2 | Mus musculus SWI/SNF related, matrix associated, actin dependent regulator of chromatin, subfamily c, member 2 (Smarcc2), mRNA. | repression | -1.41419 |
| NM_025891.3 | Smarcd3 | Mus musculus SWI/SNF related, matrix associated, actin dependent regulator of chromatin, subfamily d, member 3 (Smarcd3), mRNA. | induction  | 1.50022  |
| NM_028887.2 | Smchd1  | Mus musculus SMC hinge domain containing 1 (Smchd1), mRNA.                                                                      | induction  | 1.461993 |
| NM_013870.2 | Smtn    | Mus musculus smoothelin (Smtn), mRNA.                                                                                           | induction  | 1.229687 |
| NM_013870.1 | Smtn    | Mus musculus smoothelin (Smtn), mRNA.                                                                                           | induction  | 1.163311 |
| NM_133968.1 | Snopc2  | Mus musculus small nuclear RNA activating complex, polypeptide 2 (Snopc2), mRNA.                                                | induction  | 6.876171 |
| NM_025696   | Sorcs3  |                                                                                                                                 | repression | -3.19202 |
| NM_011443.2 | Sox2    |                                                                                                                                 | repression | -4.19393 |
| NM_011445.3 | Sox6    | Mus musculus SRY-box containing gene 6 (Sox6), transcript variant 1, mRNA.                                                      | repression | -4.53065 |
| NM_029599.1 | Spag4l  | Mus musculus sperm associated antigen 4-like (Spag4l), mRNA.                                                                    | induction  | 4.680788 |
| NM_029701.1 | Spcs3   | Mus musculus signal peptidase complex subunit 3 homolog (S. cerevisiae) (Spcs3), mRNA.                                          | repression | -1.26833 |
| NM_027650.2 | Speer3  | Mus musculus spermatogenesis associated glutamate (E)-rich protein 3 (Speer3), mRNA.                                            | repression | -3.41264 |
| NM_013675.3 | Spnb1   | Mus musculus spectrin beta 1 (Spnb1), mRNA.                                                                                     | repression | -1.10268 |
| NM_025291.2 | Sra1    | Mus musculus steroid receptor RNA activator 1 (Sra1), mRNA.                                                                     | repression | -1.23996 |
| NM_009272.4 | Srm     | Mus musculus spermidine synthase (Srm), mRNA.                                                                                   | repression | -1.28373 |
| NM_178750.4 | Ss18l1  | Mus musculus synovial sarcoma translocation gene on chromosome 18-like 1 (Ss18l1), mRNA.                                        | repression | -2.85732 |
| NM_011487.3 | Stat4   | Mus musculus signal transducer and activator of transcription 4 (Stat4), mRNA.                                                  | induction  | 7.17802  |
| NM_011488.2 | Stat5a  | Mus musculus signal transducer and activator of transcription 5A (Stat5a), mRNA.                                                | repression | -1.53381 |
| NM_011491.3 | Stc2    | Mus musculus stanniocalcin 2 (Stc2), mRNA.                                                                                      | repression | -1.29553 |
| NM_178749.3 | Stk32a  | Mus musculus serine/threonine kinase 32A (Stk32a), mRNA.                                                                        | induction  | 4.650884 |
| NM_009295.1 | Stxbp1  | Mus musculus syntaxin binding protein 1 (Stxbp1), mRNA.                                                                         | induction  | 3.858796 |
| NM_009295.1 | Stxbp1  | Mus musculus syntaxin binding protein 1 (Stxbp1), mRNA.                                                                         | induction  | 1.375561 |
| NM_011514.1 | Suv39h1 | Mus musculus suppressor of variegation 3-9 homolog 1 (Drosophila) (Suv39h1), mRNA.                                              | repression | -4.95374 |
| NM_153153.1 | Svil    | Mus musculus supervillin (Svil), transcript variant 1, mRNA.                                                                    | induction  | 1.608489 |
| NM_178046.2 | Svil    | Mus musculus supervillin (Svil),                                                                                                | induction  | 1.800204 |

|                |          |                                                                                                                                                                                                                 |            |          |
|----------------|----------|-----------------------------------------------------------------------------------------------------------------------------------------------------------------------------------------------------------------|------------|----------|
|                |          | transcript variant 2, mRNA.                                                                                                                                                                                     |            |          |
| NM_009300.2    | Svs4     | Mus musculus seminal vesicle secretory protein 4 (Svs4), mRNA.                                                                                                                                                  | induction  | 6.062812 |
| NM_009301.1    | Svs5     | Mus musculus seminal vesicle secretory protein 5 (Svs5), mRNA.                                                                                                                                                  | repression | -3.33732 |
| NM_053093.1    | Tac4     | Mus musculus tachykinin 4 (Tac4), mRNA.                                                                                                                                                                         | repression | -2.07033 |
| NM_206856.1    | Tacc2    |                                                                                                                                                                                                                 | repression | -1.32996 |
| NM_009314.2    | Tacr2    | Mus musculus tachykinin receptor 2 (Tacr2), mRNA.                                                                                                                                                               | induction  | 3.452529 |
| NM_025579.1    | Taf12    | Mus musculus TAF12 RNA polymerase II, TATA box binding protein (TBP)-associated factor (Taf12), mRNA.                                                                                                           | repression | -1.26689 |
| NM_011529.1    | Tank     | Mus musculus TRAF family member-associated Nf-kappa B activator (Tank), mRNA.                                                                                                                                   | induction  | 3.729694 |
| NM_001008545.1 | Tardbp   | Mus musculus TAR DNA binding protein (Tardbp), transcript variant 2, mRNA.                                                                                                                                      | repression | -1.29902 |
| NM_144517.3    | Tbc1d19  | Mus musculus TBC1 domain family, member 19 (Tbc1d19), mRNA.                                                                                                                                                     | induction  | 1.381966 |
| NM_011539.3    | Tbxas1   | Mus musculus thromboxane A synthase 1, platelet (Tbxas1), mRNA.                                                                                                                                                 | induction  | 1.465117 |
| NM_183289.2    | Tcerg1l  | Mus musculus transcription elongation regulator 1-like (Tcerg1l), mRNA.                                                                                                                                         | induction  | 3.098924 |
| NM_013685.2    | Tcf4     | Mus musculus transcription factor 4 (Tcf4), transcript variant 1, mRNA.                                                                                                                                         | induction  | 1.305033 |
| NM_011577.1    | Tgfb1    | Mus musculus transforming growth factor, beta 1 (Tgfb1), mRNA.                                                                                                                                                  | induction  | 1.600036 |
| NM_001013025.2 | Tgfbrap1 | Mus musculus transforming growth factor, beta receptor associated protein 1 (Tgfbrap1), mRNA.                                                                                                                   | repression | -1.19397 |
| NM_173396.2    | Tgif2    | Mus musculus TGFB-induced factor homeobox 2 (Tgif2), mRNA.                                                                                                                                                      | repression | -3.88859 |
| NM_153109.1    | Tgif2lx  | Mus musculus TGFB-induced factor homeobox 2-like, X-linked (Tgif2lx), mRNA.                                                                                                                                     | induction  | 4.055371 |
| NM_019984.2    | Tgm1     | Mus musculus transglutaminase 1, K polypeptide (Tgm1), mRNA.                                                                                                                                                    | induction  | 4.329174 |
| NM_009373.3    | Tgm2     | Mus musculus transglutaminase 2, C polypeptide (Tgm2), mRNA.                                                                                                                                                    | repression | -1.2256  |
| XM_619495.4    | Thada    | PREDICTED: Mus musculus thyroid adenoma associated (Thada), mRNA.                                                                                                                                               | repression | -1.30776 |
| NM_026909.1    | Thap7    |                                                                                                                                                                                                                 | induction  | 1.326707 |
| NM_011568.1    | Thoc4    | Mus musculus THO complex 4 (Thoc4), mRNA.                                                                                                                                                                       | repression | -1.23617 |
| NM_172485.2    | Thsd7b   | Mus musculus thrombospondin, type I, domain containing 7B (Thsd7b), mRNA.                                                                                                                                       | induction  | 2.832204 |
| NM_025372.3    | Tipin    | Mus musculus timeless interacting protein (Tipin), mRNA.                                                                                                                                                        | induction  | 1.505576 |
| NM_011599.3    | Tle1     | Mus musculus transducin-like enhancer of split 1, homolog of Drosophila E(spl) (Tle1), mRNA.<br>XM_984202 XM_984240<br>XM_984277 XM_984316<br>XM_984359 XM_984397<br>XM_984426 XM_984456<br>XM_984492 XM_984530 | repression | -1.29526 |
| NM_011599.3    | Tle1     | Mus musculus transducin-like enhancer of split 1, homolog of Drosophila E(spl) (Tle1), mRNA.<br>XM_984202 XM_984240<br>XM_984277 XM_984316<br>XM_984359 XM_984397                                               | induction  | 1.144134 |

|                |          |                                                                                                                         |            |          |
|----------------|----------|-------------------------------------------------------------------------------------------------------------------------|------------|----------|
|                |          | XM_984426 XM_984456<br>XM_984492 XM_984530                                                                              |            |          |
| NM_021297.2    | Tlr4     | Mus musculus toll-like receptor 4 (Tlr4), mRNA.                                                                         | induction  | 3.088709 |
| NM_133352.2    | Tm9sf3   | Mus musculus transmembrane 9 superfamily member 3 (Tm9sf3), mRNA.                                                       | induction  | 3.676156 |
| NM_001033433.3 | Tmem102  | Mus musculus transmembrane protein 102 (Tmem102), mRNA.                                                                 | induction  | 5.076817 |
| NM_025838.1    | Tmem107  | Mus musculus transmembrane protein 107 (Tmem107), transcript variant 1, mRNA.                                           | induction  | 1.222879 |
| NM_001034863.1 | Tmem136  | Mus musculus transmembrane protein 136 (Tmem136), mRNA.                                                                 | repression | -1.36122 |
| NM_025387.2    | Tmem14c  | Mus musculus transmembrane protein 14C (Tmem14c), mRNA.                                                                 | induction  | 1.138721 |
| NM_177260.2    | Tmem154  | Mus musculus transmembrane protein 154 (Tmem154), mRNA.                                                                 | repression | -6.00462 |
| NM_177592.3    | Tmem164  | Mus musculus transmembrane protein 164 (Tmem164), mRNA.                                                                 | repression | -1.72382 |
| NM_178381.2    | Tmem16j  | Mus musculus transmembrane protein 16J (Tmem16j), mRNA.                                                                 | induction  | 3.088279 |
| NM_029186.2    | Tmem180  | Mus musculus transmembrane protein 180 (Tmem180), mRNA.                                                                 | induction  | 1.36594  |
| NM_172608.1    | Tmem184b | Mus musculus transmembrane protein 184b (Tmem184b), mRNA.                                                               | induction  | 1.178229 |
| NM_025708.3    | Tmem186  | Mus musculus transmembrane protein 186 (Tmem186), mRNA.                                                                 | repression | -1.18808 |
| NM_028427.2    | Tmem192  | Mus musculus transmembrane protein 192 (Tmem192), mRNA.                                                                 | induction  | 1.328824 |
| NM_021793.1    | Tmem8    | Mus musculus transmembrane protein 8 (five membrane-spanning domains) (Tmem8), mRNA.                                    | induction  | 1.447829 |
| NM_020050.1    | Tmem9b   | Mus musculus TMEM9 domain family, member B (Tmem9b), mRNA.                                                              | repression | -1.15903 |
| NM_016712.2    | Tmod4    | Mus musculus tropomodulin 4 (Tmod4), mRNA.                                                                              | induction  | 1.169264 |
| NM_001013373.2 | Tmprss13 | Mus musculus transmembrane protease, serine 13 (Tmprss13), mRNA.                                                        | induction  | 2.311892 |
| NM_028651.2    | Tmtc4    | Mus musculus transmembrane and tetratricopeptide repeat containing 4 (Tmtc4), mRNA.                                     | repression | -1.73971 |
| NM_001081260.1 | Tnks1bp1 | Mus musculus tankyrase 1 binding protein 1 (Tnks1bp1), mRNA.                                                            | repression | -1.41262 |
| NM_177066.3    | Tnni3k   | Mus musculus TNNI3 interacting kinase (Tnni3k), mRNA.                                                                   | induction  | 1.117174 |
| NM_025996.1    | Tomm34   | Mus musculus translocase of outer mitochondrial membrane 34 (Tomm34), mRNA.                                             | repression | -1.15525 |
| NM_176979.5    | Topbp1   | Mus musculus topoisomerase (DNA) II binding protein 1 (Topbp1), mRNA.                                                   | repression | -3.57514 |
| NM_026429.1    | Tpppb    | Mus musculus trophoblast specific protein beta (Tpppb), mRNA.                                                           | induction  | 1.635097 |
| NM_010067.3    | Trdmt1   | Mus musculus tRNA aspartic acid methyltransferase 1 (Trdmt1), mRNA.                                                     | induction  | 2.744249 |
| NM_001039048.2 | Trim63   | Mus musculus tripartite motif-containing 63 (Trim63), mRNA.                                                             | repression | -1.21907 |
| NM_080510.1    | Trim69   | Mus musculus tripartite motif-containing 69 (Trim69), mRNA.                                                             | induction  | 1.36512  |
| NM_032000.1    | Trps1    | Mus musculus trichorhinophalangeal syndrome I (human) (Trps1), mRNA.                                                    | induction  | 1.231654 |
| NM_025537.3    | Tsfn     | Mus musculus Ts translation elongation factor, mitochondrial (Tsfn), nuclear gene encoding mitochondrial protein, mRNA. | repression | -1.24777 |
| NM_183180.1    | Tspan18  | Mus musculus tetraspanin 18                                                                                             | repression | -3.81641 |

|                |         |                                                                                                        |            |          |
|----------------|---------|--------------------------------------------------------------------------------------------------------|------------|----------|
|                |         | (Tspan18), mRNA.                                                                                       |            |          |
| NM_027192.1    | Ttl     | Mus musculus tubulin tyrosine ligase (Ttl), mRNA.                                                      | induction  | 2.842774 |
| NM_019756.2    | Tubd1   | Mus musculus tubulin, delta 1 (Tubd1), mRNA.                                                           | induction  | 1.473408 |
| NM_011876.3    | Twf2    | Mus musculus twinfilin, actin-binding protein, homolog 2 (Drosophila) (Twf2), mRNA.                    | repression | -1.14598 |
| NM_001009935.2 | Txnip   | Mus musculus thioredoxin interacting protein (Txnip), transcript variant 1, mRNA.                      | repression | -2.52403 |
| NM_153162.3    | Txnrd3  | Mus musculus thioredoxin reductase 3 (Txnrd3), mRNA.                                                   | induction  | 1.119795 |
| NM_031202.2    | Tyrp1   | Mus musculus tyrosinase-related protein 1 (Tyrp1), mRNA.                                               | induction  | 2.231881 |
| NM_023137.2    | Ubd     | Mus musculus ubiquitin D (Ubd), mRNA.                                                                  | repression | -4.93283 |
| NM_011666.1    | Ube1c   | Mus musculus ubiquitin-activating enzyme E1C (Ube1c), mRNA.                                            | induction  | 1.400949 |
| NM_001039158.1 | Ube2j2  | Mus musculus ubiquitin-conjugating enzyme E2, J2 homolog (yeast) (Ube2j2), transcript variant 3, mRNA. | repression | -8.34436 |
| NM_022022.1    | Ube4b   | Mus musculus ubiquitination factor E4B, UFD2 homolog (S. cerevisiae) (Ube4b), mRNA.                    | repression | -1.27377 |
| NM_025401.3    | Ubl5    | Mus musculus ubiquitin-like 5 (Ubl5), mRNA.                                                            | repression | -1.32818 |
| NM_001083319.1 | Ubp1    | Mus musculus upstream binding protein 1 (Ubp1), transcript variant 1, mRNA.                            | induction  | 5.034302 |
| NM_025388.2    | Ufc1    | Mus musculus ubiquitin-fold modifier conjugating enzyme 1 (Ufc1), mRNA.                                | repression | -1.05307 |
| NM_138668.1    | Ufsp2   | Mus musculus UFM1-specific peptidase 2 (Ufsp2), mRNA.                                                  | induction  | 1.750338 |
| NM_011307.2    | Uimc1   | Mus musculus ubiquitin interaction motif containing 1 (Uimc1), mRNA.                                   | induction  | 2.326257 |
| NM_009471.2    | Umps    | Mus musculus uridine monophosphate synthetase (Umps), mRNA.                                            | induction  | 1.721065 |
| NM_175352.4    | Unc119b | Mus musculus unc-119 homolog B (C. elegans) (Unc119b), mRNA.                                           | repression | -1.22292 |
| NM_194342.1    | Unc84b  | Mus musculus unc-84 homolog B (C. elegans) (Unc84b), mRNA.                                             | repression | -1.1908  |
| NM_153386.1    | Ush3a   |                                                                                                        | induction  | 5.164902 |
| NM_026031.3    | Utp11l  | Mus musculus UTP11-like, U3 small nucleolar ribonucleoprotein, (yeast) (Utp11l), mRNA.                 | induction  | 1.110675 |
| NM_134165.1    | V1rc10  | Mus musculus vomeronasal 1 receptor, C10 (V1rc10), mRNA.                                               | induction  | 3.956529 |
| NM_134174.2    | V1rc19  | Mus musculus vomeronasal 1 receptor, C19 (V1rc19), mRNA.                                               | repression | -6.75589 |
| NM_134181.1    | V1rc26  | Mus musculus vomeronasal 1 receptor, C26 (V1rc26), mRNA.                                               | repression | -4.37514 |
| NM_134184.2    | V1rc29  | Mus musculus vomeronasal 1 receptor, C29 (V1rc29), mRNA.                                               | induction  | 5.47329  |
| NM_033509.3    | Vangl2  | Mus musculus vang-like 2 (van gogh, Drosophila) (Vangl2), mRNA.                                        | induction  | 7.875261 |
| NM_177354.3    | Vash1   | Mus musculus vasohibin 1 (Vash1), mRNA.                                                                | induction  | 5.113884 |
| NM_011979.1    | Vnn3    | Mus musculus vanin 3 (Vnn3), mRNA.                                                                     | induction  | 4.317955 |
| NM_144863.3    | Wdr36   | Mus musculus WD repeat domain 36 (Wdr36), mRNA.                                                        | repression | -2.49867 |
| NM_153138.3    | Wipf1   | Mus musculus WAS/WASL interacting protein family, member 1 (Wipf1), mRNA.                              | induction  | 1.262672 |
| NM_139298.2    | Wnt9a   | Mus musculus wingless-type MMTV integration site 9A (Wnt9a), mRNA.                                     | induction  | 2.988189 |

|                |          |                                                                                                                                    |            |          |
|----------------|----------|------------------------------------------------------------------------------------------------------------------------------------|------------|----------|
| NM_133791.4    | Wwc2     | Mus musculus WW, C2 and coiled-coil domain containing 2 (Wwc2), mRNA.                                                              | repression | -1.24639 |
| NM_025830.3    | Wwp2     | Mus musculus WW domain containing E3 ubiquitin protein ligase 2 (Wwp2), mRNA.                                                      | repression | -1.68165 |
| NM_026570.1    | Yeats4   | Mus musculus YEATS domain containing 4 (Yeats4), mRNA.                                                                             | repression | -1.21327 |
| NM_172467.2    | Zc3hav1l | Mus musculus zinc finger CCCH-type, antiviral 1-like (Zc3hav1l), mRNA.                                                             | induction  | 5.314992 |
| NM_001081217.1 | Zfp174   | Mus musculus zinc finger protein 174 (Zfp174), mRNA.                                                                               | induction  | 7.033849 |
| NM_001003666.2 | Zfp457   | Mus musculus zinc finger protein 457 (Zfp457), mRNA.                                                                               | induction  | 3.565972 |
| NM_001033205.1 | Zfp575   | Mus musculus zinc finger protein 575 (Zfp575), mRNA.                                                                               | repression | -2.32048 |
| NM_172536.1    | Zfp609   | Mus musculus zinc finger protein 609 (Zfp609), mRNA.                                                                               | induction  | 1.857318 |
| NM_028298.3    | Zfp655   | Mus musculus zinc finger protein 655 (Zfp655), transcript variant 1, mRNA.                                                         | repression | -1.26797 |
| NM_001033425.1 | Zscan10  | Mus musculus zinc finger and SCAN domains 10 (Zscan10), mRNA.<br>XM_908570 XM_920921<br>XM_920929 XM_920934<br>XM_920942 XM_920949 | repression | -2.8979  |
| NM_173002.2    | Zxdc     | Mus musculus ZXD family zinc finger C (Zxdc), transcript variant 2, mRNA.                                                          | repression | -1.37866 |
